1 **Regulation of neuron-specific gene transcription by stress hormone signalling**  
2 **requires synaptic activity in zebrafish**

3

4 Helen Eachus<sup>1\*#</sup>, Dheemanth Subramanya<sup>1\*</sup>, Harriet E. Jackson<sup>1##</sup>, Guannyu  
5 Wang<sup>1</sup>, Kieran Berntsen<sup>1</sup>, John-Paul Ashton<sup>1</sup>, Umberto Esposito<sup>2</sup>, Fayaz Seifuddin<sup>3</sup>,  
6 Mehdi Pirooznia<sup>3</sup>, Eran Elhaik<sup>2</sup>, Nils Krone<sup>4</sup>, Richard A. Baines<sup>5</sup>, Marysia Placzek<sup>1</sup>,  
7 Vincent T. Cunliffe<sup>1\*\*</sup>

8 \* These authors contributed equally to this work

9 \*\* Corresponding author, ORCID 0000-0001-7483-7610

10 1: Department of Biomedical Science, University of Sheffield, Firth Court, Western  
11 Bank, Sheffield S10 2TN, UK

12 2: Department of Animal and Plant Sciences, University of Sheffield, Alfred Denny  
13 Building, Western Bank, Sheffield S10 2TN, UK

14 3: Bioinformatics and Computational Biology, National Heart, Lung and Blood  
15 Institute, National Institutes of Health, Building 12, 12 South Drive, Bethesda, MD  
16 20892, USA

17 4: Department of Oncology and Metabolism, Medical School, University of Sheffield,  
18 Beech Hill Road, Sheffield S10 2RX, UK

19 5: Division of Neuroscience and Experimental Psychology, School of Biological  
20 Sciences, Faculty of Biology, Medicine and Health, University of Manchester,  
21 Manchester Academic Health Science Centre, Manchester, M13 9PL, UK

22 # Current Address: German Resilience Center, University Medical Center, Johannes  
23 Gutenberg University Mainz, Duesbergweg 6, 55128 Mainz, Germany

24 ## Current Address: Department of Genetics, St Mary's Hospital, Oxford Road,  
25 Manchester M13 9WL, UK

26  
27 **Abstract**

28  
29 The Glucocorticoid Receptor (GR) co-ordinates metabolic and behavioural  
30 responses to stressors. We hypothesised that GR influences behaviour by  
31 modulating specific epigenetic and transcriptional processes in the brain. Using the  
32 zebrafish as a model organism, the brain methylomes of wild-type and *gr*<sup>s357</sup> mutant  
33 adults were analysed and GR-sensitive, differentially methylated regions (GR-DMRs)  
34 were identified. Two genes with GR-DMRs exhibited distinct methylation and  
35 transcriptional sensitivities to GR: the widely expressed direct GR target *fkbp5* and  
36 neuron-specific *aplp1*. In larvae, neural activity is required for GR-mediated  
37 transcription of *aplp1*, but not for that of *fkbp5*. GR regulates metabotropic glutamate  
38 receptor gene expression, the activities of which also modulated *aplp1* expression,  
39 implicating synaptic neurotransmission as an effector of GR function upstream of  
40 *aplp1*. Our results identify two distinct routes of GR-regulated transcription in the  
41 brain, including a pathway through which GR couples endocrine signalling to  
42 synaptic activity-regulated transcription by modulating metabotropic glutamate  
43 receptor expression.

44

45

46

## 47 **Introduction**

48

49 Interactions between an organism and its environment modify physiology and

50 behaviour through co-ordinated changes to neural and endocrine signalling.

51 Perception or anticipation of stressful sensory stimuli by the Central Nervous System

52 (CNS) elicits a wide range of adaptive responses, including heightened cognition,

53 altered affect, mobilisation of energy stores and the activation of locomotor

54 responses (McEwen, 2012). Within the mammalian CNS, production of adaptive

55 physiological responses to behavioural stressors is governed by interactions

56 between the limbic system and the hypothalamo-pituitary-adrenal (HPA) axis

57 (McEwen and Wingfield, 2010). Stress-induced activation of the HPA axis causes

58 the adrenal gland to release glucocorticoid hormones into the circulation. In target

59 cells, glucocorticoids bind to the Glucocorticoid Receptor (GR), a sequence-specific,

60 DNA-binding transcription factor, inducing its translocation from the cytoplasm to the

61 nucleus and thus facilitating its interactions with target DNA sequences (Kadmiel and

62 Cidlowski, 2013).

63 Previous studies have identified targets of GR-mediated regulation and

64 epigenetic control downstream of HPA axis activation (Gray et al., 2017; Sacta et al.,

65 2016). In the zebrafish, a genetically and pharmacologically tractable model

66 vertebrate, the GR regulates behaviour and the transcription of genes that function

67 within the equivalent of the HPA axis, the hypothalamus-pituitary-interrenal (HPI)

68 axis (Facchinello et al., 2017; Griffiths et al., 2012; Ziv et al., 2013). Many aspects of

69 the molecular mechanisms through which the GR regulates genomic targets in the

70 developing and adult brain have not yet been elucidated. In particular, it remains

71 unclear how glucocorticoid signalling regulates genes that influence neural circuit

72 function. In order to obtain new insights into the impacts of GR function on epigenetic  
73 processes in the vertebrate brain, we carried out a comparative DNA methylome  
74 analysis of the brains of age-matched wild-type and mutant *gr*<sup>s357</sup> adult male  
75 zebrafish. We hypothesised that GR target genes exhibit developmentally-regulated,  
76 glucocorticoid-sensitive patterns of DNA methylation in the brain. Moreover, since  
77 adaptive physiological and behavioural responses to environmental stressors require  
78 integration of endocrine and neural signalling activity within the central nervous  
79 system, we further hypothesised that signal integration is achieved at least in part  
80 through GR-mediated coupling of endocrine signalling to neural activity-dependent  
81 pathways of gene regulation. Our results support these hypotheses and yield novel  
82 insights into the molecular mechanisms through which endocrine signalling  
83 influences neural function.

84

85

## 86 Results

87

88 A loss-of-function mutation in the *nr3c1* gene encoding the zebrafish Glucocorticoid  
89 Receptor (GR), denoted *gr<sup>s357</sup>*, was previously shown to cause abnormally high  
90 levels of HPI axis gene expression, elevated blood cortisol, and behavioural  
91 abnormalities suggestive of increased behavioural anxiety (Griffiths et al., 2012; Ziv  
92 et al., 2013). An initial analysis of locomotor behaviours and measurement of whole  
93 body cortisol of wild-type and *gr<sup>s357</sup>* mutant adults and larvae supported and  
94 extended these findings (Figure 1), confirming a requirement for GR in regulation of  
95 both nervous and endocrine system functions in larval and adult stages. *gr<sup>s357</sup>*  
96 mutant larvae and adults swam more slowly, larvae were more dispersed, and adults  
97 froze more frequently, were less exploratory and less dark aversive than age-  
98 matched wild-type animals (Figure 1 A-J). Moreover, *gr<sup>s357</sup>* mutant larvae and adults  
99 had higher whole body cortisol levels than age-matched wild-type animals (Figure 1  
100 K,L). These phenotypes suggested that the *gr<sup>s357</sup>* mutant could be a tractable subject  
101 for elucidating the molecular mechanisms that integrate stress hormone signalling  
102 with neural activity-dependent processes. A wide range of studies have implicated  
103 epigenetic mechanisms as mediators of altered transcriptional responses to  
104 behavioural stressors (Gray et al., 2017; Zannas and Chrousos, 2017). To  
105 investigate the role of glucocorticoid signalling in the epigenetic regulation of neural  
106 stress responses in zebrafish, we analysed the DNA methylomes of wild-type and  
107 *gr<sup>s357</sup>* mutant whole adult brain samples (Figure 2). Whole Genome Bisulfite  
108 Sequencing (WGBS) identified 249 genomic loci exhibiting differential methylation in  
109 the brains of *gr<sup>s357</sup>* mutant and wild type males (Figure 2 Source Data 1). Gene  
110 Ontology analysis using the PANTHER Over-representation Test identified 14 GO

111 Terms within the Biological Process Category that were significantly associated with  
112 GR DMR-linked genes (Figure 2-figure supplement 1). Differentially Methylated  
113 Regions (DMRs) were ranked according to degree of differential methylation  
114 between genotypes (Figure 2 Source data 1), and a subset of high ranking DMRs  
115 linked to genes with biologically salient functional annotations were selected for  
116 confirmatory deep sequencing analysis in 10 additional wild-type and 10 *gr<sup>s357</sup>*  
117 mutant adult male brains, using the BisPCR<sup>2</sup> technique (Bernstein et al., 2015). Of  
118 the 11 DMRs subjected to this analysis (Figure 2-figure supplement 2), only 3 of  
119 them exhibited significant differential methylation in whole brains of wild-type and  
120 *gr<sup>s357</sup>* mutant adults (Figure 3A, Figure 4A, Figure 2-figure supplement 3, Figure 2-  
121 figure supplement 4, Figure 3-figure supplement 1A). A closely spaced cluster of  
122 three CpGs within the *fkbp5* intron 1 GR-DMR, and two CpGs within the *npepl1*  
123 intron 1 GR-DMR, were hypermethylated in *gr<sup>s357</sup>* mutant compared to wild-type  
124 brains (Figure 3A, Figure 3-figure supplement 1A). In addition, two CpGs within a  
125 cluster located in the *aplp1* intron 1 GR-DMR were hypomethylated in *gr<sup>s357</sup>* mutant  
126 compared to wild-type brains (Figure 4A). *Fkbp5* is a known direct target of the GR  
127 and encodes a protein which negatively regulates GR by tethering it in the cytoplasm  
128 in a complex with HSP90 (Zannas et al., 2016). *Npepl1* is an M17 aminopeptidase  
129 with no known function (Matsui et al., 2006), and *Aplp1* is a neuron-specific cell  
130 adhesion molecule closely related to Amyloid Precursor Protein (APP), which  
131 maintains dendritic spines and regulates basal synaptic neurotransmission (Schilling  
132 et al., 2017). The other 8 loci identified as putative DMRs by WGBS were not  
133 confirmed by BisPCR<sup>2</sup> deep sequencing analysis (Figure 2-figure supplement 4),  
134 and not studied further.

135

136 **Genes harbouring or near to Glucocorticoid Receptor-regulated DNA**

137 **methylation sites exhibit GR-regulated transcription in the adult brain**

138

139 Having identified GR-sensitive DMRs that are significantly differentially methylated in  
140 adult wild-type and *gr*<sup>s357</sup> mutant whole brain samples, the transcript abundance of  
141 the genes was investigated using qRT-PCR. Transcription of *fkbp5* was almost  
142 completely extinguished in *gr*<sup>s357</sup> mutant brain tissue (Figure 3 B), whereas  
143 transcription of *aplp1* exhibited a robust ~12-fold increase in the *gr*<sup>s357</sup> mutant (Figure  
144 4B). The transcript abundance of *npepl1* was only slightly reduced by loss of GR  
145 function (Figure 3-figure supplement 1B). The considerable impacts of GR function  
146 on transcription of *fkbp5* and *aplp1* in the adult brain, together with the  
147 complementarity of their DNA methylation and transcriptional sensitivities to loss of  
148 GR function in this tissue, suggested that these two genes might be particularly  
149 informative subjects with which to investigate the molecular mechanisms  
150 downstream of glucocorticoid signalling *in vivo*.

151

152

153 **The glucocorticoid-sensitivities of *fkbp5* and *aplp1* are regulated differentially**

154 **by GR during zebrafish development**

155

156 In order to investigate whether the GR-regulated DNA methylation and  
157 transcriptional sensitivities of *fkbp5* and *aplp1* that are apparent in the adult brain are  
158 established during development, methylation at the *fkbp5* and *aplp1* DMRs were  
159 measured in wild-type and *gr*<sup>s357</sup> mutant embryos at the blastula stage, before the  
160 onset of zygotic gene transcription, and in free-swimming wild-type and *gr*<sup>s357</sup> mutant

161 5 d.p.f. larvae. The pharmacological tractability of zebrafish larvae also enabled us to  
162 investigate the impacts of exogenous glucocorticoid treatment on DNA methylation  
163 and transcription of *fkbp5* and *aplp1*, using the synthetic glucocorticoid  
164 betamethasone, which is a selective agonist of the GR (Grossmann et al., 2004).  
165 None of the CpGs within the *fkbp5* GR-DMR showed any difference in their levels of  
166 methylation in wild-type and *gr<sup>s357</sup>* mutant blastulae (Figure 3C). However, in  
167 dissected 5 d.p.f larval head tissue, the CpGs within the *fkbp5* GR-DMR exhibited  
168 complementary changes in methylation level in response to exogenous  
169 glucocorticoid and loss of GR function (Figure 3D). Thus, betamethasone exposure  
170 reduced the level of methylation of the *fkbp5* GR-DMR in wild-type larvae, whereas  
171 methylation of the *fkbp5* GR-DMR was increased in *gr<sup>s357</sup>* mutant larvae, and this  
172 increase persisted when *gr<sup>s357</sup>* mutant larvae were exposed to betamethasone.  
173 Moreover, the glucocorticoid-sensitive and GR-dependent methylation changes  
174 observed within the *fkbp5* GR-DMR were accompanied by complementary increases  
175 in *fkbp5* transcript abundance in wild-type larvae exposed to glucocorticoid, or  
176 strongly reduced transcription in both untreated and glucocorticoid-treated *gr<sup>s357</sup>*  
177 mutant larvae, at both 3 d.p.f. and 5 d.p.f. (Figure 3E). Whole-mount *in situ*  
178 hybridisation analysis of *fkbp5* transcription in 5 d.p.f. larvae confirmed that  
179 transcripts were expressed at low levels in untreated wild-type larvae and strongly  
180 induced by betamethasone treatment, but completely undetectable in *gr<sup>s357</sup>* mutant  
181 larvae, whether they were exposed to betamethasone or not (Figure 3F). Taken  
182 together, these results demonstrate that in the larval and the adult zebrafish brain,  
183 glucocorticoid signalling mediated via the DNA binding function of GR promotes  
184 transcription of *fkbp5* and reduces methylation of a cluster of CpGs within intron 1 of  
185 this gene.



186           Within the *aplp1* intron 1 GR-DMR, all six of its CpGs were nearly fully  
187 methylated in wild-type and *gr<sup>s357</sup>* mutant blastulae (Figure 4C). This high level of  
188 CpG methylation persisted in in 5 d.p.f. wild-type and *gr<sup>s357</sup>* mutant larvae, whether  
189 they were exposed to exogenous glucocorticoid or not (Figure 4D). However, *aplp1*  
190 transcription was strongly induced in wild-type larvae by exogenous glucocorticoid,  
191 but not in *gr<sup>s357</sup>* mutant larvae, at both 3 d.p.f. and 5 d.p.f. (Figure 4E). *In situ*  
192 hybridisation analysis revealed that GR-independent, basal expression of *aplp1* is  
193 restricted to the developing larval brain (Figure 4F). Exposure of wild-type larvae to  
194 exogenous glucocorticoid increased *aplp1* expression throughout the brain, but this  
195 increase was not observed in *gr<sup>s357</sup>* mutant larvae (Figure 4F). Thus, at larval stages,  
196 glucocorticoid signalling through the GR robustly induced transcription of *aplp1*  
197 without modifying methylation of its GR-sensitive DMR.

198

199

200   ***Glucocorticoid-inducible transcription of *aplp1*, unlike *fkbp5*, is insensitive to***  
201 ***functional inhibition of the GR co-chaperone protein *Fkbp5****

202

203 Our experimental findings suggested that there are important differences in the  
204 molecular mechanisms that determine CpG methylation of the *fkbp5* and *aplp1* GR-  
205 DMRs and the transcriptional responses of these two genes to glucocorticoid  
206 signalling. Through a direct interaction with GR, the Fkbp5 protein has been shown  
207 to set the concentration of glucocorticoid required to promote nuclear import of GR to  
208 regulate target gene transcription (Galat, 2013; Wochnik et al., 2005; Zannas and  
209 Binder, 2014). To investigate whether this buffering function of the Fkbp5 protein  
210 limits the transcriptional responses of *fkbp5* and *aplp1* genes to exogenous

211 glucocorticoid, the small molecules FK506 and SAFit2 (Gaali et al., 2015) were used  
212 to inhibit Fkbp5 function in wild-type and *gr<sup>s357</sup>* mutant larvae, and the  
213 responsiveness of *fkbp5* and *aplp1* to a subsequent betamethasone exposure was  
214 then measured by qRT-PCR. FK506 inhibits multiple FKBP5s that include Fkbp5 and  
215 Fkbp4, whereas SAFit2 is a highly specific inhibitor of Fkbp5 (Gaali et al., 2015;  
216 Zannas and Binder, 2014). 4 d.p.f. larvae were exposed to 1  $\mu$ M FK506 (Figure 5A,B)  
217 or to 100nM SAFit2 (Figure 5C,D) alone for 1 hour, after which betamethasone was  
218 then added to the medium at final concentrations of 5, 10, 20, 50, or 100  $\mu$ M for a  
219 further 2 hours. Both FK506 and SAFit2 robustly enhanced the glucocorticoid  
220 concentration-dependent induction of *fkbp5* transcription in wild-type larvae, whereas  
221 *fkbp5* transcription in *gr<sup>s357</sup>* mutant larvae was completely unresponsive to FK506,  
222 SAFit2 and betamethasone (Figure 5A,C). Thus, in the larval brain, the  
223 FK506/SAFit2 protein target Fkbp5 buffers the responsiveness of the *fkbp5* gene to  
224 the available concentration of glucocorticoid, and when Fkbp5 function is inhibited,  
225 the transcriptional response of *fkbp5* to glucocorticoid is enhanced. By contrast,  
226 exposure of 4 d.p.f. larvae to FK506 and SAFit2 had no effect on the sensitivity or  
227 magnitude of the glucocorticoid concentration-dependent induction of *aplp1*, which  
228 was, nevertheless strictly dependent on GR function (Figure 5B,D). Moreover, the  
229 responsiveness of *aplp1* to glucocorticoid treatment exhibited a sharper, more  
230 discontinuous, threshold-like response, in comparison to the qualitatively distinct,  
231 more graded transcriptional response of *fkbp5* to glucocorticoid. These results  
232 suggest that whilst GR-mediated, glucocorticoid-induced transcription of *fkbp5* is  
233 buffered by available Fkbp5 protein function, *aplp1* transcription is not constrained by  
234 Fkbp5. We conclude that *aplp1* is regulated by a GR-dependent mechanism distinct  
235 from that which regulates the responsiveness of *fkbp5* to glucocorticoid signalling.

236 **Synaptic activity acts downstream of glucocorticoid signalling in zebrafish**

237 **larvae to regulate transcription of *aplp1* but not methylation of the *aplp1* GR-**

238 **DMR**

239

240 Our studies show that *aplp1* is specifically expressed in the zebrafish brain and that  
241 glucocorticoid-induced, GR-dependent transcription of *aplp1* is not buffered by  
242 Fkbp5 protein function (Figure 5B,D), unlike that of *fkbp5*. Together with the known  
243 functions of Ap1 in maintaining dendritic spines and promoting synaptic activity  
244 (Schilling et al., 2017), these findings suggested that transcriptional regulation of  
245 *aplp1* is mechanistically distinct from that of *fkbp5* and might represent a site for  
246 functional integration of glucocorticoid and synaptic signalling within the larval brain.  
247 To investigate whether neural activity modulates glucocorticoid-induced transcription  
248 of *aplp1* and *fkbp5*, we used CRISPR/Cas9 to create a loss-of-function mutation in  
249 *stxbp1a*, which is specifically expressed in neurons (Figure 6A), and required for  
250 synaptic neurotransmission (Grone et al., 2016). A loss-of-function allele was  
251 generated, *stxbp1a<sup>sh438</sup>*, in which a 15 bp deletion combined with a 5 bp insertion  
252 destroyed the exon 8 - intron 8 splice junction (Figure 6B). Consistent with previously  
253 published observations on other *stxbp1a* alleles (Grone et al., 2016), homozygous  
254 *stxbp1a<sup>sh438</sup>* mutants appear morphologically normal but they are immotile (Figure  
255 6C). *stxbp1a<sup>sh438</sup>* mutants also lack neural activity when measured by patch  
256 clamping of individual neurones (Figure 6D). When the neural activity reporter  
257 transgene *NBT:GCaMP3* was introduced into the *stxbp1a<sup>sh438</sup>* mutant line, imaging  
258 of GCaMP3 fluorescence in 3 d.p.f. larvae (Bergmann et al., 2018) further confirmed  
259 a lack of neural activity within the *stxbp1a<sup>sh438</sup>* mutant larval brain (Figure 6E, Figure  
260 6 – video 1, Figure 6 – video 2). Moreover, exposure of homozygous *stxbp1a<sup>sh438</sup>*

261 mutant larvae to the neural activity-inducing compound Pentylenetetrazole (PTZ)  
262 also failed to elicit increased locomotor movements, more frequent action potentials,  
263 or widespread transcription of the synaptic activity-regulated gene *cfos* in the brain,  
264 as was observed in wild-type siblings (Figure 6C,D,F). To determine whether the two  
265 distinct modes of glucocorticoid-inducible transcription of *aplp1* and *fkbp5* were  
266 affected by loss of *stxbp1a* function, we compared *aplp1* and *fkbp5* transcription in 4  
267 d.p.f. wild-type and *stxbp1a*<sup>sh438</sup> mutant larvae exposed to exogenous glucocorticoid,  
268 in the presence or absence of the specific Fkbp5 inhibitor SAFit2 (Figure 7). Wild-  
269 type larvae exhibited a robust, glucocorticoid concentration-dependent induction of  
270 *aplp1* transcription, which was insensitive to SAFit2, whereas the inducibility of *aplp1*  
271 was extinguished in *stxbp1a*<sup>sh438</sup> mutant larvae (Figure 7A). In striking contrast,  
272 glucocorticoid concentration-dependent induction of *fkbp5* transcription was  
273 enhanced by SAFit2 and remained unchanged by homozygosity for the *stxbp1a*<sup>sh438</sup>  
274 mutation (Figure 7B). Thus, in the larval brain, *stxbp1a*-dependent synaptic signalling  
275 renders *aplp1* competent for transcriptional activation by glucocorticoid in an Fkbp5-  
276 independent manner, but *stxbp1a* is not required for glucocorticoid-induced, Fkbp5-  
277 buffered transcription of the *fkbp5* gene. In order to determine whether the  
278 methylation levels of CpGs within the *aplp1* and *fkbp5* GR-DMRs were sensitive to  
279 glucocorticoid signalling in the absence of *stxbp1a* function, their percentage  
280 methylation in larval head tissue was compared in 4 d.p.f. wild-type and homozygous  
281 *stxbp1a*<sup>sh438</sup> mutant larvae, after exposure to exogenous glucocorticoid. The high  
282 level of methylation of all 6 CpGs within the *aplp1* GR-DMR was unaltered by loss of  
283 *stxbp1a* function at any of these CpGs, and remained unchanged after exposure of  
284 either wild-type or *stxbp1a*<sup>sh438</sup> mutant larvae to exogenous glucocorticoid (Figure  
285 7C). However, methylation of all 4 CpGs within the *fkbp5* GR-DMR was reduced by

286 exposure of either wild-type or *stxbp1a*<sup>sh438</sup> mutant larvae to exogenous  
287 glucocorticoid (Figure 7D). Taken together, our results indicate that the induction of  
288 *aplp1* transcription by glucocorticoid signalling requires *stxbp1a*-dependent synaptic  
289 activity but is unbuffered by *Fkbp5* protein function, and that methylation of the *aplp1*  
290 DMR is unaffected by loss of *stxbp1a* function. By contrast, the induction of *fkbp5*  
291 transcription by glucocorticoid does not require *stxbp1a* function, and this inducibility  
292 is buffered by existing levels of *Fkbp5* protein. Moreover, exogenous glucocorticoid  
293 caused hypomethylation of the *fkbp5* DMR independently of *stxbp1a* function.

294 To investigate whether increased levels of excitatory synaptic activity could  
295 directly induce transcription of *aplp1* and *fkbp5* downstream of glucocorticoid  
296 signalling, wild-type and *gr*<sup>s357</sup> mutant larvae were exposed to the neural activity-  
297 inducing convulsant agent PTZ or control medium for 90 minutes, and the  
298 expression levels of *aplp1* and *fkbp5* were then determined by qRT-PCR. The results  
299 show that *aplp1* transcription is induced by PTZ in both wild-type and *gr*<sup>s357</sup> mutant  
300 larvae (Figure 7E). By contrast, *fkbp5* mRNA was not induced by PTZ treatment, but  
301 the low basal level of transcription was nevertheless strictly dependent on wild-type  
302 GR function (Figure 7F). These results indicate that synaptic activity acts  
303 downstream of GR function in zebrafish larvae to promote *aplp1* transcription in  
304 response to glucocorticoid signalling without modulating methylation at the *aplp1*  
305 GR-DMR. In contrast, glucocorticoid-induced *fkbp5* transcription is accompanied by  
306 reduced methylation of all four CpGs within the *fkbp5* GR-DMR, and is independent  
307 of synaptic activity in the larval CNS.

308

309

310 ***The Glucocorticoid Receptor regulates metabotropic glutamate receptor***  
311 ***expression upstream of *aplp1****

312

313 Glucocorticoids are well-documented regulators of glutamatergic signalling (Popoli et  
314 al., 2011; Treccani et al., 2014), and recently published evidence suggests roles for  
315 stress-induced glucocorticoid signalling in the regulation of metabotropic glutamate  
316 receptor expression (Nasca et al., 2015a; Nasca et al., 2015b). We compared  
317 expression of all known metabotropic glutamate receptor genes in wild-type and  
318 *gr<sup>s357</sup>* mutant zebrafish, and found that expression of the Group II genes *grm2a*,  
319 *grm2b*, *grm3* and the Group I gene *grm5a* exhibited clear-cut sensitivities to loss of  
320 GR function (Figure 8). In the adult brain, loss of GR function reduced expression of  
321 *grm2a*, *grm2b*, and *grm3*, whereas expression of *grm5a* was increased (Figure 8A).  
322 In *gr<sup>s357</sup>* mutant larvae, expression of *grm2a*, *grm2b* and *grm3* was similarly reduced,  
323 and expression of *grm5a* was increased (Figure 8B). Moreover, exposure of wild-  
324 type larvae to exogenous glucocorticoid increased *grm2a*, *grm2b*, and *grm3*  
325 expression but decreased expression of *grm5a*, in a GR-dependent manner (Figure  
326 8B). Next, we investigated whether transcriptional responses of *grm2a*, *grm2b*, *grm3*  
327 and *grm5a* to glucocorticoid signalling were affected by loss of *stxbp1a* function. We  
328 observed that exogenous glucocorticoid elicited increased expression of *grm2a*,  
329 *grm2b*, and *grm3* equally in *stxbp1a<sup>sh438</sup>* mutant larvae and in their wild-type siblings  
330 (Figure 8C), but the glucocorticoid-suppressible expression of *grm5a* observed in  
331 wild-type larvae was abrogated in *stxbp1a<sup>sh438</sup>* mutants. These results suggest that  
332 GR promotes glucocorticoid-induced transcription of *grm2a*, *grm2b* and *grm3* in  
333 presynaptic neurones independently of *stxbp1a* function, and that glucocorticoid-  
334 suppressible *grm5a* transcription in post-synaptic neurones involves synaptic activity

335 requiring *stxbp1a* function. To determine whether Grm2a, Grm2b, Grm3 and Grm5a  
336 activities might regulate *aplp1* expression downstream of GR, wild-type and *gr<sup>s357</sup>*  
337 mutant larvae were exposed to the Grm2a/Grm2b/Grm3 agonist LY354740 and/or  
338 the Grm5 antagonist SIB-1893. Both LY354740 and SIB-1893 treatments caused  
339 similar increases in *aplp1* mRNA levels that were additive, in wild-type and *gr<sup>s357</sup>*  
340 mutant larvae (Figure 9A). Treatment of wild-type larvae with exogenous  
341 glucocorticoid alone, or after exposure to LY354740 and/or SIB-1893, robustly  
342 induced *aplp1* to a higher level than could be achieved with LY354740 and/or SIB-  
343 1893 alone, but this increase was abolished in *gr<sup>s357</sup>* mutant larvae (Figure 9A).  
344 However, when phenotypically wild-type sibling and homozygous *stxbp1a<sup>sh438</sup>*  
345 mutant larvae were treated with Grm2a/Grm2b/Grm3 agonist LY354740, only wild-  
346 type sibling larvae exhibited significantly increased *aplp1* expression (Figure 9B),  
347 indicating that synaptic activity is required for LY354740 to enhance *aplp1* transcript  
348 levels post-synaptically. By contrast, the Grm5a antagonist SIB-1893 enhanced  
349 *aplp1* transcript abundance in both wild-type sibling and *stxbp1a<sup>sh438</sup>* mutant larvae,  
350 confirming that *aplp1* expression was increased by Grm5a inhibition in post-synaptic  
351 cells (Figure 9B). As was observed for *gr<sup>s357</sup>* mutant larvae, *aplp1* transcription  
352 remained unresponsive to exogenous glucocorticoid in *stxbp1a<sup>sh438</sup>* mutant larvae,  
353 whilst wild-type larvae treated with exogenous glucocorticoid alone, or after exposure  
354 to LY354740 and/or SIB-1893, robustly induced *aplp1* to a much higher level than  
355 was observed with LY354740 and/or SIB-1893 alone. Taken together, these results  
356 indicate that glucocorticoid signalling via the GR increases Group II metabotropic  
357 glutamate receptor expression, decreases expression of the Group I receptor  
358 Grm5a, and induces *aplp1* transcription in postsynaptic neurones of the larval brain.  
359 Furthermore, a pharmacological activator of Group II metabotropic glutamate

360 receptors acts downstream of GR but upstream of Stxbp1a to promote *aplp1*  
361 expression post-synaptically, whereas a pharmacological inhibitor of the Group I  
362 receptor Grm5a functions downstream of both GR and Stxbp1a, post-synaptically, to  
363 enhance *aplp1* transcription.

364

365

## 366 Discussion

367

### 368 ***GR regulates neural gene transcription and DNA methylation dynamics in*** 369 ***zebrafish larvae and adults***

370

371 Adaptive responses to environmental stressors require integration and modulation of  
372 endocrine and neural signals within the central nervous system. We hypothesised  
373 that glucocorticoid signalling mediated by GR regulates specific epigenetic and  
374 transcriptional networks in the brain that regulate behavioural responses to stress.  
375 Our studies of the epigenetic and transcriptional impacts of glucocorticoid signalling  
376 mediated by the Glucocorticoid Receptor support this hypothesis. Our DNA  
377 methylation analysis of the brains of wild-type and *gr*<sup>s357</sup> mutant adults identified GR-  
378 sensitive DMRs within the first introns of *fkbp5* and *aplp1*, which are accompanied by  
379 GR-dependent changes in the transcription of these genes in the brain. In *gr*<sup>s357</sup>  
380 mutant adult brains, methylation levels were increased at three of four CpGs within  
381 the *fkbp5* DMR and transcription of *fkbp5* was extinguished. Conversely, two of six  
382 CpGs within the *aplp1* DMR exhibited decreased methylation in *gr*<sup>s357</sup> mutant adult  
383 brains, and *aplp1* transcription was increased by more than 12-fold. These  
384 methylation changes likely reflect transcriptional regulatory functions of DNA



385 sequences within the identified GR-DMRs that could contribute to the GR-dependent  
386 transcriptional changes we have identified for *fkbp5* and *aplp1*. The fractional  
387 changes in the level of methylation at the *fkbp5* and *aplp1* DMRs indicate that for  
388 both genes, the observed methylation changes occur in relatively small proportions  
389 of the adult brain samples that were analysed. These findings contrast with the large  
390 changes in transcript abundance observed in adult brain tissue samples and in wild-  
391 type larvae exposed to exogenous glucocorticoid (Figures 3 and 4), raising the  
392 possibility that, for both *fkbp5* and *aplp1*, there are other, as yet unidentified, DMRs  
393 within or near to these genes that could also exhibit glucocorticoid sensitivity in  
394 distinct neuronal populations and contribute to the glucocorticoid-inducibility of these  
395 genes.

396 We were surprised to discover that a majority of the 11 DMRs identified by  
397 WGBS exhibited no significant difference in the level of DNA methylation in wild-type  
398 and *gr<sup>s357</sup>* mutant adult brains subjected to deep sequence analysis using the  
399 BisPCR<sup>2</sup> technique (Figure 2-figure supplement 4). These differences are likely to be  
400 due, at least in part, to the different sensitivities of the two techniques. Whilst the  
401 WGBS analysis was genome-wide, it provided only a small number of reads per  
402 sample for any given CpG within the genome. By contrast, the BisPCR<sup>2</sup> analysis was  
403 targeted at a small number of specific CpGs within specific DMRs in great depth,  
404 typically yielding many thousands of reads per CpG per tissue sample. Given the  
405 considerable tissue complexity and neuronal heterogeneity within the adult brain,  
406 limited-depth WGBS would thus be expected to reveal the methylation state for any  
407 given CpG in only a small number of cells from any given tissue sample, whereas  
408 the greater sequencing depth of the BisPCR<sup>2</sup> analysis provides a much more

409 representative indication of the overall percentage methylation of selected CpGs,  
410 within a larger proportion of the cell population under analysis.

411

412

413 ***GR-dependent, glucocorticoid-induced transcription of *fkbp5* is accompanied***  
414 ***by reduced methylation of the *fkbp5* GR-DMR in zebrafish larvae and adults***

415

416 The absence of *fkbp5* mRNA in the zebrafish adult *gr*<sup>s357</sup> mutant brain confirms that  
417 GR activates transcription of *fkbp5* in this tissue. The ability of exogenous  
418 glucocorticoid to suppress methylation of the *fkbp5* GR-DMR in larvae, and co-  
419 ordinally induce *fkbp5* transcription in a GR-dependent manner, further suggests  
420 that in a subset of neural cells, GR actively drives transcription-linked demethylation  
421 at the GR-DMR, raising the possibility that GR function leads to the recruitment of  
422 one or more TET demethylases that promote *fkbp5* transcription in these cells.

423 Sequence analysis of the *fkbp5* promoter reveals the presence of three

424 Glucocorticoid Response Elements (GREs) within a 200bp region located 100-300bp  
425 from the transcription start site (Figure 10). Analysis of the *fkbp5* GR-DMR sequence

426 indicates similarities with binding sites for the transcription factors RHOXF1, CREB1,

427 JUND, NR2F1, RXRA, and PAX4, recruitment of which may be regulated by the GR-

428 dependent demethylation of the GR-DMR we have identified. Associations are

429 known between variation in *cis*-regulatory DNA sequences within the human *FKBP5*

430 gene and human psychiatric disorders (Criado-Marrero et al., 2018). The DNA

431 sequence polymorphism *rs1360780*, located within intron 2 of the human *FKBP5*

432 gene, modulates *FKBP5* demethylation, transcription, and susceptibility to stress-

433 related psychiatric disorders (Klengel et al., 2013). Further analysis of the GR-DMR

434 we have identified within intron 1 of the zebrafish *fkbp5* gene may also help to  
435 understand the relationships between GR function, DNA demethylation, *fkbp5*  
436 transcription, and the pathobiology of such affective disorders.

437

438

439 ***Synaptic activity mediates GR-dependent induction of *aplp1* transcription in***  
440 ***the zebrafish larval brain via a metabotropic glutamate receptor-regulated***  
441 ***pathway***

442

443 In the *gr<sup>s357</sup>* mutant adult brain, loss of GR function caused a robust increase in  
444 *aplp1* transcription, together with the decreased methylation at adjacent CpGs within  
445 the *aplp1* GR-DMR, demonstrating that GR is involved in attenuating transcription of  
446 *aplp1* and promoting DNA methylation of the *aplp1* GR-DMR in the adult wild-type  
447 brain. By contrast, in wild-type larvae, *aplp1* transcription was glucocorticoid-  
448 inducible, but its GR-DMR was hypermethylated and unresponsive to glucocorticoid  
449 treatment. The *aplp1* GR-DMR of *gr<sup>s357</sup>* mutant larvae exhibited the same degree of  
450 methylation as in wild-type larvae and was similarly unresponsive to glucocorticoid  
451 treatment. Moreover, loss of GR-function did not cause the substantial transcriptional  
452 de-repression of *aplp1* in *gr<sup>s357</sup>* mutant larvae, that was observed in the *gr<sup>s357</sup>* mutant  
453 adult brain. These results indicate that whilst GR mediates the glucocorticoid  
454 inducibility of *aplp1* in larvae, in the adult brain it functions as a direct or indirect  
455 transcriptional repressor of *aplp1*. Such distinct properties at different stages of  
456 development might be the result of neural adaptations resulting from exposure to  
457 external stimuli encountered across the life course, and/or the development of  
458 neuronal structures in the adult brain in which the function of GR is different to that

459 performed in the simpler larval brain. In mammals, *Aplp1* is a transmembrane-  
460 spanning homotypic cell adhesion molecule closely related to the Amyloid Precursor  
461 Protein (APP), that is localized to both pre- and post-synaptic membranes, where it  
462 stabilizes dendritic spines, promotes basal neurotransmission and is sensitive to  
463 proteolysis by gamma-secretase (Ludewig and Korte, 2016; Schauenburg et al.,  
464 2018; Schilling et al., 2017). Neural activity-induced changes in *aplp1* expression in  
465 the zebrafish brain might thus modulate synapse structure and function, facilitating  
466 neural circuit remodelling in response to changes in sensory input. JASPAR analysis  
467 of the DNA sequence corresponding to the *aplp1* GR-DMR indicated that the  
468 differentially methylated CpGs lie within an E-box-like potential binding site for bHLH  
469 transcriptional regulators, including the Aryl hydrocarbon-regulated Ahr/ARNT,  
470 Notch-regulated transcription factors Hes1/Hey1/Hey2, the hypoxia-regulated  
471 transcription factor HIF1, the cell cycle regulators Myc and Nmyc, and Tcf15 (Figure  
472 10). Whilst there are no apparent GREs in the *aplp1* promoter, a single putative GRE  
473 is located at nucleotides 15:37257059-15:37257074, 7004 nucleotides away from  
474 the *aplp1* GR-DMR that could potentially mediate a direct interaction between GR  
475 and the *aplp1* gene.

476 Our comparison of the impacts of pharmacological inhibitors of Fkbp5 function on the  
477 glucocorticoid inducibility of *fkbp5* and *aplp1* in wild-type and *gr<sup>s357</sup>* mutant larvae  
478 indicated that transcription of *fkbp5* was enhanced by Fkbp5 inhibition, whereas that  
479 of *aplp1* was not. This difference, together with the neural-specific expression pattern  
480 of *aplp1*, suggested that the mechanisms regulating glucocorticoid-induced  
481 transcription of *fkbp5* and *aplp1* are distinct. Remarkably, in *stxbp1a<sup>sh438</sup>*  
482 homozygous mutant larvae, transcription of *fkbp5* remained fully glucocorticoid-  
483 inducible, whereas, *aplp1* transcription did not respond to glucocorticoid treatment,

484 demonstrating that the synaptic activity enabled by *Stxbp1a* function is required  
485 downstream of GR activity to permit glucocorticoid-induced *aplp1* transcription.  
486 Furthermore, treatment of larvae with the neural activity-inducing GABA<sub>A</sub> receptor  
487 antagonist PTZ strongly induced *aplp1* transcription in both wild-type and *gr<sup>s357</sup>*  
488 mutant larvae, whilst PTZ was unable to elicit *fkbp5* transcription in either wild-type  
489 or *gr<sup>s357</sup>* mutant larvae. These complementary results confirm that the molecular  
490 mechanisms mediating glucocorticoid-induced transcription of *fkbp5* and *aplp1* in  
491 zebrafish larvae are qualitatively distinct, and demonstrate that neural activity acts  
492 downstream of glucocorticoid signalling to induce *aplp1* transcription.

493 Many studies have shown that glucocorticoid signalling can regulate  
494 glutamate release within the mammalian CNS (Popoli et al., 2011). The mGlu<sub>2</sub>  
495 metabotropic glutamate receptor has recently been shown to function downstream of  
496 glucocorticoid signalling in the mouse hippocampus (Nasca et al., 2015a). We found  
497 that GR promotes transcription of the zebrafish Group II *grm* genes *grm2a*, *grm2b*,  
498 and *grm3*, and represses the Group I gene *grm5a*, in both adult brain and larval  
499 head tissue samples. Moreover, in the larval brain, *grm2a*, *grm2b* and *grm3* were  
500 induced by exogenous glucocorticoid, whereas *grm5a* expression was inhibited by  
501 glucocorticoid (Figure 8). The loss of *grm5a* expression in *stxbp1a<sup>sh438</sup>* mutant  
502 larvae further indicates that expression of *grm5a* lies downstream of the post-  
503 synapse.

504 We found that a pharmacological agonist of Grm2a/Grm2b/Grm3, and a  
505 pharmacological antagonist of Grm5a both increased transcription of *aplp1* in wild-  
506 type and *gr<sup>s357</sup>* mutant larvae, suggesting that these metabotropic glutamate  
507 receptors independently modulate synaptic activity downstream of GR function and  
508 upstream of *aplp1*. Furthermore, whilst the Grm5a antagonist SIB-1893 increased

509 *aplp1* expression in *stxbp1a<sup>sh438</sup>* mutant larvae, the Group II Receptor agonist  
510 LY354740 did not. On the basis of these results, we propose a model in which  
511 glucocorticoid-bound GR promotes *grm2a*, *grm2b* and *grm3* expression  
512 presynaptically, whilst it attenuates *grm5a* expression and stimulates *aplp1*  
513 transcription post-synaptically (Figure 11). Our results further indicate that  
514 presynaptic Grm2a/Grm2b/Grm3 activity promotes *aplp1* transcription post-  
515 synaptically, and that transcription of *aplp1* is limited by Grm5a activity in  
516 postsynaptic neurons. It is possible that exposure to exogenous glucocorticoids  
517 triggers release of excitatory and/or inhibitory neurotransmitters from presynaptic  
518 terminals in the larval CNS, and it seems likely that the *grm* genes we have identified  
519 play important roles in regulating synaptic plasticity in response to such  
520 glucocorticoid signalling, by modulating expression of *aplp1* and potentially other  
521 synapse components. Future studies will explore these possibilities and further  
522 elucidate the biological function of the *GR-Grm-Stxbp1a-Aplp1* pathway that we have  
523 identified.

524

525

526

527 **Materials and Methods**

528 *Zebrafish Husbandry*

529 Adult zebrafish were maintained with a 14 h light/10 h dark cycle at 28°C according  
530 to standard protocols and were mated using spawning tanks. The *nr3c1* mutant  
531 allele *gr<sup>s357</sup>* (Ziv et al., 2013) was obtained from Herwig Baier (MPI for Neurobiology,  
532 Martinsried, Germany) and zebrafish were genotyped at the *nr3c1* locus by  
533 sequencing genomic DNA-derived PCR products encompassing the s357 mutation.  
534 Homozygous mutant and wild-type sibling adult populations were created by in-  
535 crossing adult *gr<sup>s357</sup>* heterozygotes, and the resulting larvae were raised to  
536 adulthood. Young adults were genotyped by fin-clipping to establish groups of  
537 homozygous wild-type and homozygous *gr<sup>s357</sup>* mutant fish, which were maintained in  
538 separate tanks and then used for behavioural and molecular analysis. Larvae for  
539 experimental analysis were obtained from in-crosses of wild type and homozygous  
540 mutant adult siblings. Larvae were maintained in petri dishes containing E3 medium  
541 at 28.5°C and staged according to Kimmel's guide (Kimmel et al., 1995). All  
542 procedures involving experimental animals were performed in compliance with local  
543 and national animal welfare laws, guidelines and policies. Adult zebrafish were  
544 analysed aged 11-15 months and larvae aged up to 5 d.p.f. Brains used for WGBS  
545 and targeted bisulfite sequencing, and adult body samples for steroid extraction were  
546 from males, whilst other experiments used equal numbers of males and females.  
547 Heterozygous *stxbp1a<sup>sh438</sup>* mutant adults were in-crossed to produce *stxbp1a<sup>sh438</sup>*  
548 homozygous mutant larvae and phenotypically wild-type sibling larvae for  
549 experimental analysis.

550

551

552

553 *Behavioural analysis*

554 Zebbralab and Shoaling softwares (Viewpoint, France) were used to track the  
555 movement of individual zebrafish when isolated and in shoals respectively, to  
556 provide quantitative measures of swimming behaviour, as previously described  
557 (Eachus et al., 2017). Locomotor activity of 3 d.p.f. *stxbp1a*<sup>sh438</sup> homozygous mutant  
558 and sibling larvae, maintained in the presence or absence of 5mM  
559 Pentylenetetrazole, was measured over a 1 hour period in the Zebabox (Viewpoint,  
560 France), as previously described (Baxendale et al., 2012).

561 *Open field test*: individual fish were acclimated to the empty tank, horizontal  
562 swimming behaviour was then recorded for 10 minutes, as previously described  
563 (Eachus et al., 2017).

564 *Tank diving test*: vertical swimming behaviour of individual fish was recorded and  
565 binned at 1 minute intervals in a 10 minute test, as previously described (Eachus et  
566 al., 2017).

567 *Scototaxis test*: horizontal swimming behaviour of individual fish, performed in the  
568 light half of the tank, was recorded in a 10 minute test and binned every 1 minute, as  
569 previously described (Eachus et al., 2017).

570 *Shoaling analysis of larvae*: shoals of 21 larvae aged 5.d.p.f were transferred to a  
571 circular petri dish and horizontal swimming behaviour was then recorded for 10  
572 minutes as previously described (Eachus et al., 2017).

573

574 *Extraction and quantification of cortisol*

575 Individual adult zebrafish were culled via a rapid overdose of Tricaine followed by  
576 decapitation and the body was snap frozen for cortisol extraction. Larval cortisol



577 samples were collected from pools of 21 larvae aged 5 d.p.f., which were snap  
578 frozen in an Eppendorf tube. Cortisol was extracted using previously described  
579 protocols for adult and larval zebrafish respectively (Cachat et al., 2010; Yeh et al.,  
580 2013). Whole body cortisol was then quantified using the ELISA protocol previously  
581 described (Cachat et al., 2010; Yeh et al., 2013).

582

### 583 *Quantitative RT-PCR*

584 Pools of dissected larval heads or whole larvae were snap frozen at 3, 4 or 5 d.p.f..  
585 RNA extraction, cDNA synthesis and qRT-PCR were carried out as previously  
586 described (Eachus et al., 2017).

587

### 588 *In situ hybridisation*

589 Whole-mount *in situ* hybridisation on larvae was performed according to standard  
590 protocols (Boyd et al., 2015). Details of plasmids used to generate Digoxigenin-  
591 labelled RNA *in situ* hybridization probes for *fkbp5*, *aplp1*, *stxbp1a* and *cfos* are  
592 available on request.

593

### 594 *Whole Genome Bisulfite Sequencing*

595 Whole brains (two wild type and two *gr<sup>s357</sup>* mutant) were dissected from adult  
596 zebrafish and genomic DNA was extracted using the Qiagen DNAeasy kit. DNA  
597 sequencing libraries were prepared and sequenced using 125 bp paired end reads  
598 on an Illumina Hiseq by GATC Biotech. Sequence data quality was inspected using  
599 FastQC and reads were trimmed to phred-quality Q15. Reads were aligned to the  
600 reference genome (*Danio rerio*, GRCz10 release 85) using Bismark with the default  
601 parameters (Krueger and Andrews, 2011). PCR duplicates were removed and

602 methylation calls were made using Bismark v0.15.0. Regions that were differentially  
603 methylated in mutants were detected using the bsseq R package v1.8.2 with default  
604 parameters: the data were smoothed, low coverage (<2x coverage in all samples)  
605 CpGs were removed, t-statistics were computed and thresholded at 4.6 to identify  
606 differentially methylated CpGs (<https://support.bioconductor.org/p/78227/>). The  
607 WGBS DNA sequence data and associated metadata are available at the NCBI  
608 Gene Expression Omnibus under Accession Number GSE120632.  
609 Gene Ontology (GO) analysis of the genes lying adjacent to or harbouring DMRs  
610 were carried out using PANTHER (Mi et al., 2013).  
611 Methylation heatmaps were constructed using DeepTools (v3.1.3). Genes were  
612 scaled to 10 000 bp and methylation was averaged in 250 bp bins. Methylation was  
613 plotted for 1448 genes exhibiting >95% CpG coverage within the interval spanning  
614 5kb upstream of the Transcription Start Site (TSS), the gene body and 5kb  
615 downstream of the Transcription Termination Site (TTS), for wild-type and *gr<sup>s357</sup>*  
616 mutant samples.

617

#### 618 *Targeted BS-PCR using the BisPCR<sup>2</sup> method*

619 Whole brains (from ten wild type and ten mutant adult fish ~ 1 year in age) were  
620 dissected from adult zebrafish and genomic DNA was extracted using the Qiagen  
621 DNAeasy kit. Library preparation was based on previously published protocols  
622 (Bernstein et al., 2015). ~200 ng of each DNA sample was bisulfite treated using the  
623 Qiagen Epitect kit, according to the kit instructions, and quantified using an Agilent  
624 Tapestation with High-sensitivity tape.  
625 100pg bisulfite-converted DNA was amplified for 40 cycles in PCR round 1, using  
626 KAPA Hifi Uracil+ Readymix with 300nM primer. The optimum annealing

627 temperature and MgCl<sub>2</sub> concentration for each primer pair were determined by  
628 analysing PCR products on a 2% agarose gel. The PCR round 1 primers included a  
629 25-30 bp amplicon-specific sequence, designed using MethPrimer (Bernstein et al.,  
630 2015) plus an 18 bp overhang to allow the annealing of PCR round 2 primers. All  
631 PCR round 1 amplicons were pooled for each individual sample at 10 ng/amplicon  
632 based on quantification via the Agilent Tapestation. Excess primers and dNTPs were  
633 removed using the Qiagen PCR clean-up kit. Individual samples were then barcoded  
634 via a second round of PCR. PCR round 2 reactions were 20ul, using the KAPA Hifi  
635 Uracil+ mastermix, with 300 nM primer and 1 ng of pooled PCR round 1 product for  
636 each sample. The PCR round 2 forward primer was identical to the 5' overhang on  
637 the PCR round 1 amplicons, whilst the reverse primer included a region to anneal to  
638 the 3' overhang on the PCR round 1 amplicons, plus a 6 bp sample-specific barcode.  
639 The final barcoded amplicons ranged from 199-270 bp. Excess primers and dNTPs  
640 were removed using the Qiagen PCR clean-up kit. Sample quantity and size was  
641 determined using the Agilent Tapestation. Products outside of the expected range  
642 were removed using AMPure XP beads. Samples were then pooled in an equimolar  
643 manner, and a 500 ng pool was shipped to GATC Biotech for sequencing. Illumina  
644 adapters were ligated by GATC Biotech and the samples were sequenced on the  
645 Illumina Hiseq for 150 bp paired end reads.  
646 Sequence quality was determined using FastQC  
647 (<http://www.bioinformatics.babraham.ac.uk/projects/fastqc>). Sequence data was  
648 demultiplexed using QIIME 1 (Caporaso et al., 2010; Li and Dahiya, 2002) and  
649 primers were trimmed using cutadapt  
650 (<https://journal.embnet.org/index.php/embnetjournal/article/view/200>). Data was

651 aligned to the reference genome (*Danio rerio*, GRCz10 release 85) and methylation  
652 levels were called using BSseeker2 (Guo et al., 2013).

653

#### 654 *Creation of mutations in stxbp1a using CRISPR/Cas9 gene editing*

655 The CRISPR/Cas9 gene editing approach was used to induce targeted mutations at  
656 the *stxbp1a* locus (Hwang et al., 2013; Sander et al., 2010). To induce mutations in  
657 *stxbp1a*, an *stxbp1a*-specific ultramer was designed, using the ZiFit Targeter  
658 (<http://zifit.partners.org/ZiFiT/>), having the following DNA sequence:

659 5' AAAGCACCGACTCGGTGCCACTTTTTCAAGTTGATAACGGACTAGCCTTATTTTAACTTG  
660 CTATTTCTAGCTCTAAAA**CCATTGTAGGATCATCTGCC**CTATAGTGAGTCGTATTACGC3'

661 The *stxbp1a*-specific 20-mer target sequence (highlighted in bold) includes 10 of 11  
662 nucleotides corresponding to a BslI recognition site (italics) and lies adjacent to the  
663 T7 promoter sequence (underlined). The *stxbp1a*-specific Ultramer was annealed to  
664 a short oligonucleotide complementary to its T7 promoter sequence, and an *stxbp1a*-  
665 specific Cas9 guide RNA (gRNA) was then synthesized in vitro using the  
666 MEGAshortscript T7 kit (life Technologies). Cas9 mRNA was similarly synthesized  
667 by *in vitro* transcription and combined with gRNA in water. 1 cell embryos were  
668 injected with 2-4nl of a CRISPR/Cas9 RNA mixture containing 2.4µg/µl gRNA and  
669 0.5µg/µl Cas9 mRNA in water. A proportion of injected embryos were collected after  
670 one day of development and analysed for mutagenesis of the targeted *stxbp1a* exon  
671 8 using PCR and a BslI restriction digest of the 214bp PCR amplicon, which  
672 identified BslI-insensitive mutant alleles. PCR primers for amplification of exon 8  
673 were:

674 5' -**ACAGATGTCAGTAGTCTCGG**-3' (STXBP1A3F), and

675 5' -TTTCTCTCTCCCTGCAGTGC-3' (STXBP1A3R). Other CRISPR/Cas9-injected  
676 embryos were raised to adulthood and these F<sub>0</sub> fish were then outcrossed to wild-  
677 type AB adults to produce F<sub>1</sub> progeny. Genomic DNA was isolated from F<sub>1</sub> individual  
678 embryos and subjected to PCR to identify F<sub>0</sub> animals transmitting BslI-insensitive  
679 *stxbp1a* exon 8 alleles to F<sub>1</sub> progeny. Mutations were identified by DNA sequencing  
680 of BslI-insensitive amplicons. F<sub>0</sub> adult transmitters of BslI-insensitive *stxbp1a* exon 8  
681 alleles were further outcrossed to AB stocks and F<sub>1</sub> germline heterozygous adults  
682 were raised and genotyped by fin clipping to establish mutant lines. These  
683 experiments led to the identification of the *stxbp1a*<sup>sh438</sup> allele, which was named  
684 using the “sh” designation for University of Sheffield, in accordance with the  
685 published ZFIN guidelines.

686  
687 *Pharmacological manipulation of embryos and larvae*

688 Betamethasone (BM) and FK506 were dissolved in ethanol to give stocks of 10mM.  
689 Pentylentetrazole (PTZ) was dissolved in E3 medium to give a stock of 200mM.  
690 SAFit2 and SIB1893 were dissolved in DMSO to give stock concentrations of 10mM  
691 and 50mM, respectively. LY354470 was dissolved in water to give a stock  
692 concentration of 50mM. Chemical stocks were then diluted into E3 medium  
693 containing embryos or larvae, which were then incubated at 28.5°C for the required  
694 period of time, before larvae were collected for molecular analysis or analysed for  
695 behavioural phenotypes in the Zebrafish .

696

697

698

699 *Electrophysiological analysis of neuronal activity in  $stxbp1a^{sh438}$  mutant and sibling*

700 *larvae*

701 Zebrafish larvae aged 3-4 d.p.f. were anaesthetized in 0.02% tricaine (MS-222,  
702 Sigma–Aldrich, UK) and pinned through the notochord onto an electrophysiological  
703 recording chamber. After removal of the overlying skin, muscles in one rhabdomere  
704 were removed using a sharpened tungsten wire to uncover the spinal cord. The  
705 preparation was transferred to a microscope stage and perfused at room  
706 temperature (1ml per min, 20–24°C) with an aerated recording solution that  
707 contained 15  $\mu$ M d-tubocurarine (Sigma) to paralyze the preparations, but lacked  
708 tricaine. The recording solution contained (in mM) 134 NaCl, 2.9 KCl, 2.1 CaCl<sub>2</sub>, 1.2  
709 MgCl<sub>2</sub>, 10 HEPES, and 10 D-glucose, 285 mOsm, pH 7.8. Whole-cell recordings  
710 were obtained from large cell-bodied neurons (assumed to be motor neurones, but  
711 identity not validated). Patch-clamp pipettes, pulled from borosilicate glass, had  
712 resistances of 3.5–5 M $\Omega$ . The intracellular solution contained (in mM) 115 K-  
713 gluconate, 15 KCl, 2 NaCl<sub>2</sub>, 10 HEPES, 10 EGTA, 295 mOsm, pH 7.2. Recordings  
714 were made in I-clamp mode using an Axopatch 200B amplifier (Molecular Devices,  
715 Sunnyvale, CA) and were low-pass filtered at 1 kHz and digitized at 10 kHz.

716

717 *Light Sheet Imaging of neuronal activity in  $stxbp1a^{sh438}$  mutant and sibling larvae*

718 Adult carriers of both the  $stxbp1a^{sh438}$  mutation and the  $Tg(Xla.Tubb:GCaMP3)^{sh344}$   
719 transgene (Bergmann et al., 2018) were crossed to generate transgenic embryos  
720 that were either homozygous for the  $stxbp1a^{sh438}$  mutant allele and immotile, or  
721 siblings that were motile. When they were aged 3 d.p.f., transgenic embryos that  
722 were motile or immotile were then mounted in 3% agarose in the Zeiss Z.1 Light  
723 Sheet microscope and imaged for 5 minutes. Imaging data was processed and

724 analysed with an algorithm to measure GCaMP3 fluorescence levels within larval  
725 brain Z-sections (Bergmann et al., 2018).

726

### 727 *Statistical analysis*

728 Statistical analysis and graphics were created in 'R' and Graphpad Prism. Data were  
729 tested for equal variance and normality prior to analysis. Statistical significance was  
730 tested using *t*-tests or Analysis Of Variance and *post hoc* analysis via pairwise  
731 comparisons. Where data under analysis was not normally distributed, significance  
732 was determined using the Mann-Whitney test with Sidak's correction. In all graphs,  
733 bars represent the mean  $\pm$  standard error of the mean. \* indicates  $p < 0.05$ , \*\*  $p < 0.01$ ,  
734 \*\*\*  $p < 0.001$ , \*\*\*\*  $p < 0.0001$ .

735

### 736 **Acknowledgements**

737 This research was funded by an award to VTC and M Placzek from the UK joint  
738 Biotechnology and Biological Sciences Research Council / Economic and Social  
739 Research Council Epigenetics Initiative (grant number ES/N000528/1), by a Pilot  
740 Grant in Epilepsy to VTC from Epilepsy Research UK (PGE1303), by a Research  
741 Grant to VTC and NK from the International Fund raising for Congenital Adrenal  
742 Hyperplasia, and by a PhD studentship to DS from the Medical Research Council  
743 Discovery Medicine North Doctoral Training Partnership (MR/N013840/1). We thank  
744 the zebrafish aquarium staff at the University of Sheffield for fish care and  
745 husbandry, the Sheffield Zebrafish Screening Facility for behavioural analysis, and  
746 the staff of the University of Sheffield Wolfson Light Microscopy Facility, for light-  
747 sheet microscopy, supported by a BBSRC ALERT14 award (BB/M012522/1). We  
748 are grateful to Wolf Reik, Felix Krueger, Thomas Stubbs, Ferdinand von Meyenn,

749 Jurriaan Ton and Joost Stassen for advice on methods for methylome analysis, and  
750 Anton Nikolaev for help with analysing live imaging data. RAB thanks Declan Ali for  
751 training in zebrafish electrophysiology and acknowledges the Biotechnology and  
752 Biological Sciences Research Council for research funding (BB/L027690/1).

753

#### 754 **Author Contributions**

755 VTC conceived the study; HE, DS, HEJ, RAB and VTC designed the experiments;  
756 HE, DS, HEJ, GW, KB, JPA, RAB and VTC performed the experiments; HE, DS,  
757 HEJ, GW, KB, EE, NK, RAB, M Placzek and VTC analysed the experimental results;  
758 HE, DS, UE, FS, M Pirooznia and EE performed computational bioinformatic  
759 analysis of DNA sequence data; HE, DS, HEJ, NK, RAB, M Placzek and VTC wrote  
760 the manuscript. All authors read and approved the final manuscript.

761

#### 762 **Ethics**

763 Animal experimentation: all animal work was performed under licence from the UK  
764 Home Office and approved by the University of Sheffield Ethical Review Committee  
765 (ASPA Ethical Review Process).

766

#### 767 **Competing Interests**

768 The authors declare that they have no competing interests.

769

#### 770 **Data Availability**

771 Source data for this study are available within the article, its supplementary  
772 information files and in the Gene Expression Omnibus under Accession Code  
773 GSE120632.



## 774 References

- 775 Baxendale, S., Holdsworth, C.J., Meza Santoscoy, P.L., Harrison, M.R., Fox, J., Parkin, C.A.,  
776 Ingham, P.W., and Cunliffe, V.T. (2012). Identification of compounds with anti-  
777 convulsant properties in a zebrafish model of epileptic seizures. *Dis Model Mech* 5, 773-  
778 784.
- 779 Bergmann, K., Meza Santoscoy, P., Lygdas, K., Nikolaeva, Y., MacDonald, R.B., Cunliffe,  
780 V.T., and Nikolaev, A. (2018). Imaging Neuronal Activity in the Optic Tectum of Late  
781 Stage Larval Zebrafish. *J Dev Biol* 6.
- 782 Bernstein, D.L., Kameswaran, V., Le Lay, J.E., Sheaffer, K.L., and Kaestner, K.H. (2015).  
783 The BisPCR(2) method for targeted bisulfite sequencing. *Epigenetics Chromatin* 8, 27.
- 784 Boyd, P.J., Cunliffe, V.T., Roy, S., and Wood, J.D. (2015). Sonic hedgehog functions  
785 upstream of disrupted-in-schizophrenia 1 (*disc1*): implications for mental illness. *Biol*  
786 *Open* 4, 1336-1343.
- 787 Cachat, J., Stewart, A., Grossman, L., Gaikwad, S., Kadri, F., Chung, K.M., Wu, N., Wong, K.,  
788 Roy, S., Suci, C., *et al.* (2010). Measuring behavioral and endocrine responses to novelty  
789 stress in adult zebrafish. *Nat Protoc* 5, 1786-1799.
- 790 Caporaso, J.G., Kuczynski, J., Stombaugh, J., Bittinger, K., Bushman, F.D., Costello, E.K.,  
791 Fierer, N., Pena, A.G., Goodrich, J.K., Gordon, J.I., *et al.* (2010). QIIME allows analysis of  
792 high-throughput community sequencing data. *Nat Methods* 7, 335-336.
- 793 Criado-Marrero, M., Rein, T., Binder, E.B., Porter, J.T., Koren, J., 3rd, and Blair, L.J. (2018).  
794 Hsp90 and FKBP51: complex regulators of psychiatric diseases. *Philosophical*  
795 *transactions of the Royal Society of London Series B, Biological sciences* 373.
- 796 Eachus, H., Bright, C., Cunliffe, V.T., Placzek, M., Wood, J.D., and Watt, P.J. (2017).  
797 Disrupted-in-Schizophrenia-1 is essential for normal hypothalamic-pituitary-interrenal  
798 (HPI) axis function. *Human molecular genetics* 26, 1992-2005.
- 799 Facchinello, N., Skobo, T., Meneghetti, G., Colletti, E., Dinarello, A., Tiso, N., Costa, R.,  
800 Gioacchini, G., Carnevali, O., Argenton, F., *et al.* (2017). *nr3c1* null mutant zebrafish are  
801 viable and reveal DNA-binding-independent activities of the glucocorticoid receptor. *Sci*  
802 *Rep* 7, 4371.
- 803 Gaali, S., Kirschner, A., Cuboni, S., Hartmann, J., Kozany, C., Balsevich, G., Namendorf, C.,  
804 Fernandez-Vizarra, P., Sippel, C., Zannas, A.S., *et al.* (2015). Selective inhibitors of the  
805 FK506-binding protein 51 by induced fit. *Nat Chem Biol* 11, 33-37.
- 806 Galat, A. (2013). Functional diversity and pharmacological profiles of the FKBP5 and  
807 their complexes with small natural ligands. *Cell Mol Life Sci* 70, 3243-3275.
- 808 Gray, J.D., Kogan, J.F., Marrocco, J., and McEwen, B.S. (2017). Genomic and epigenomic  
809 mechanisms of glucocorticoids in the brain. *Nat Rev Endocrinol* 13, 661-673.
- 810 Griffiths, B.B., Schoonheim, P.J., Ziv, L., Voelker, L., Baier, H., and Gahtan, E. (2012). A  
811 zebrafish model of glucocorticoid resistance shows serotonergic modulation of the  
812 stress response. *Front Behav Neurosci* 6, 68.
- 813 Grone, B.P., Marchese, M., Hamling, K.R., Kumar, M.G., Krasniak, C.S., Sicca, F., Santorelli,  
814 F.M., Patel, M., and Baraban, S.C. (2016). Epilepsy, Behavioral Abnormalities, and  
815 Physiological Comorbidities in Syntaxin-Binding Protein 1 (STXBP1) Mutant Zebrafish.  
816 *PLoS One* 11, e0151148.
- 817 Grossmann, C., Scholz, T., Rochel, M., Bumke-Vogt, C., Oelkers, W., Pfeiffer, A.F.,  
818 Diederich, S., and Bahr, V. (2004). Transactivation via the human glucocorticoid and  
819 mineralocorticoid receptor by therapeutically used steroids in CV-1 cells: a comparison  
820 of their glucocorticoid and mineralocorticoid properties. *Eur J Endocrinol* 151, 397-406.

- 821 Guo, W., Fiziev, P., Yan, W., Cokus, S., Sun, X., Zhang, M.Q., Chen, P.Y., and Pellegrini, M.  
822 (2013). BS-Seeker2: a versatile aligning pipeline for bisulfite sequencing data. *BMC*  
823 *Genomics* *14*, 774.
- 824 Hwang, W.Y., Fu, Y., Reyon, D., Maeder, M.L., Tsai, S.Q., Sander, J.D., Peterson, R.T., Yeh,  
825 J.R., and Joung, J.K. (2013). Efficient genome editing in zebrafish using a CRISPR-Cas  
826 system. *Nat Biotechnol* *31*, 227-229.
- 827 Kadmiel, M., and Cidlowski, J.A. (2013). Glucocorticoid receptor signaling in health and  
828 disease. *Trends Pharmacol Sci* *34*, 518-530.
- 829 Kimmel, C.B., Ballard, W.W., Kimmel, S.R., Ullmann, B., and Schilling, T.F. (1995). Stages  
830 of embryonic development of the zebrafish. *Dev Dyn* *203*, 253-310.
- 831 Klengel, T., Mehta, D., Anacker, C., Rex-Haffner, M., Pruessner, J.C., Pariante, C.M., Pace,  
832 T.W., Mercer, K.B., Mayberg, H.S., Bradley, B., *et al.* (2013). Allele-specific FKBP5 DNA  
833 demethylation mediates gene-childhood trauma interactions. *Nature neuroscience* *16*,  
834 33-41.
- 835 Krueger, F., and Andrews, S.R. (2011). Bismark: a flexible aligner and methylation caller  
836 for Bisulfite-Seq applications. *Bioinformatics* *27*, 1571-1572.
- 837 Li, L.C., and Dahiya, R. (2002). MethPrimer: designing primers for methylation PCRs.  
838 *Bioinformatics* *18*, 1427-1431.
- 839 Ludewig, S., and Korte, M. (2016). Novel Insights into the Physiological Function of the  
840 APP (Gene) Family and Its Proteolytic Fragments in Synaptic Plasticity. *Front Mol*  
841 *Neurosci* *9*, 161.
- 842 Matsui, M., Fowler, J.H., and Walling, L.L. (2006). Leucine aminopeptidases: diversity in  
843 structure and function. *Biol Chem* *387*, 1535-1544.
- 844 McEwen, B.S. (2012). Brain on stress: how the social environment gets under the skin.  
845 *Proc Natl Acad Sci U S A* *109 Suppl 2*, 17180-17185.
- 846 McEwen, B.S., and Wingfield, J.C. (2010). What is in a name? Integrating homeostasis,  
847 allostasis and stress. *Horm Behav* *57*, 105-111.
- 848 Mi, H., Muruganujan, A., Casagrande, J.T., and Thomas, P.D. (2013). Large-scale gene  
849 function analysis with the PANTHER classification system. *Nat Protoc* *8*, 1551-1566.
- 850 Mifsud, K.R., and Reul, J. (2018). Mineralocorticoid and glucocorticoid receptor-  
851 mediated control of genomic responses to stress in the brain. *Stress* *21*, 389-402.
- 852 Nasca, C., Bigio, B., Zelli, D., Nicoletti, F., and McEwen, B.S. (2015a). Mind the gap:  
853 glucocorticoids modulate hippocampal glutamate tone underlying individual  
854 differences in stress susceptibility. *Mol Psychiatry* *20*, 755-763.
- 855 Nasca, C., Zelli, D., Bigio, B., Piccinin, S., Scaccianoce, S., Nistico, R., and McEwen, B.S.  
856 (2015b). Stress dynamically regulates behavior and glutamatergic gene expression in  
857 hippocampus by opening a window of epigenetic plasticity. *Proc Natl Acad Sci U S A* *112*,  
858 14960-14965.
- 859 Popoli, M., Yan, Z., McEwen, B.S., and Sanacora, G. (2011). The stressed synapse: the  
860 impact of stress and glucocorticoids on glutamate transmission. *Nat Rev Neurosci* *13*,  
861 22-37.
- 862 Sacta, M.A., Chinenov, Y., and Rogatsky, I. (2016). Glucocorticoid Signaling: An Update  
863 from a Genomic Perspective. *Annu Rev Physiol* *78*, 155-180.
- 864 Sander, J.D., Maeder, M.L., Reyon, D., Voytas, D.F., Joung, J.K., and Dobbs, D. (2010). ZiFiT  
865 (Zinc Finger Targeter): an updated zinc finger engineering tool. *Nucleic Acids Res* *38*,  
866 W462-468.
- 867 Schauenburg, L., Liebsch, F., Eravci, M., Mayer, M.C., Weise, C., and Multhaup, G. (2018).  
868 APLP1 is endoproteolytically cleaved by gamma-secretase without previous  
869 ectodomain shedding. *Sci Rep* *8*, 1916.

870 Schilling, S., Mehr, A., Ludewig, S., Stephan, J., Zimmermann, M., August, A., Strecker, P.,  
871 Korte, M., Koo, E.H., Muller, U.C., *et al.* (2017). APLP1 Is a Synaptic Cell Adhesion  
872 Molecule, Supporting Maintenance of Dendritic Spines and Basal Synaptic Transmission.  
873 *The Journal of neuroscience : the official journal of the Society for Neuroscience* 37,  
874 5345-5365.  
875 Treccani, G., Musazzi, L., Perego, C., Milanese, M., Nava, N., Bonifacino, T., Lamanna, J.,  
876 Malgaroli, A., Drago, F., Racagni, G., *et al.* (2014). Stress and corticosterone increase the  
877 readily releasable pool of glutamate vesicles in synaptic terminals of prefrontal and  
878 frontal cortex. *Mol Psychiatry* 19, 433-443.  
879 Wochnik, G.M., Ruegg, J., Abel, G.A., Schmidt, U., Holsboer, F., and Rein, T. (2005). FK506-  
880 binding proteins 51 and 52 differentially regulate dynein interaction and nuclear  
881 translocation of the glucocorticoid receptor in mammalian cells. *J Biol Chem* 280, 4609-  
882 4616.  
883 Yeh, C.M., Glock, M., and Ryu, S. (2013). An optimized whole-body cortisol quantification  
884 method for assessing stress levels in larval zebrafish. *PLoS One* 8, e79406.  
885 Zannas, A.S., and Binder, E.B. (2014). Gene-environment interactions at the FKBP5  
886 locus: sensitive periods, mechanisms and pleiotropism. *Genes Brain Behav* 13, 25-37.  
887 Zannas, A.S., and Chrousos, G.P. (2017). Epigenetic programming by stress and  
888 glucocorticoids along the human lifespan. *Mol Psychiatry* 22, 640-646.  
889 Zannas, A.S., Wiechmann, T., Gassen, N.C., and Binder, E.B. (2016). Gene-Stress-  
890 Epigenetic Regulation of FKBP5: Clinical and Translational Implications.  
891 *Neuropsychopharmacology : official publication of the American College of*  
892 *Neuropsychopharmacology* 41, 261-274.  
893 Ziv, L., Muto, A., Schoonheim, P.J., Meijsing, S.H., Strasser, D., Ingraham, H.A., Schaaf, M.J.,  
894 Yamamoto, K.R., and Baier, H. (2013). An affective disorder in zebrafish with mutation  
895 of the glucocorticoid receptor. *Mol Psychiatry* 18, 681-691.  
896

897 .

898

899

900

901

902 **Figure Legends**

903

904 **Figure 1**

905 ***The Glucocorticoid Receptor (GR) regulates behaviour and whole body***  
906 ***cortisol levels in larval and adult zebrafish.***

907 (A) Shoaling analysis of 5 d.p.f. larvae under baseline (control) and stressed (NaCl)  
908 conditions. Swimming speed of wild-type shoals (21 larvae per shoal) is reduced  
909 under stress, whilst *gr<sup>s357</sup>* mutant larvae swim more slowly than wild-type larvae  
910 under baseline conditions, and swim speed is not affected by saline stress. Values  
911 are expressed as means +/- s.e.m. A two-way ANOVA identified genotype:treatment  
912 interactions,  $F=14.41$ ,  $d.f.=1, 20$ ,  $p=0.001$ ).  $N = 6$  each group. \* indicates statistical  
913 differences in Tukey post-hoc analysis, \*  $p < 0.05$ , \*\*  $p < 0.01$ , \*\*\*  $p < 0.001$ .

914 (B) The Nearest Neighbour Distance (NND) of wild-type shoals increases under  
915 saline stress, whilst *gr<sup>s357</sup>* mutant shoals exhibit a higher NND than wild-type larvae,  
916 both at baseline and under conditions of saline stress. Values are expressed as  
917 means +/- s.e.m. A two-way ANOVA identified genotype: treatment interactions,  
918  $F=8.09$ ,  $d.f.=1, 20$ ,  $p=0.01$ ).  $N = 6$  shoals (21 larvae per shoal) each group. \*  
919 indicates statistical differences in Tukey post-hoc analysis, \*  $p < 0.05$ , \*\*  $p < 0.01$ .

920 (C-E) Behavioural analysis of adult fish in the open field test reveals that *gr<sup>s357</sup>*  
921 mutants show (C) increased duration of freezing (*t*-test,  $t=-3.57$ ,  $d.f.=15.33$ ,  
922  $p=0.003$ ), (D) increased duration of slow swimming (*t*-test,  $t=-2.94$ ,  $d.f.=13.11$ ,  
923  $p=0.011$ ), and (E) decreased thigmotaxis (*t*-test,  $t=2.47$ ,  $d.f.=12.86$ ,  $p=0.028$ ), in  
924 comparison to wild-type siblings. Values are expressed as means +/- s.e.m.  $N = 9$   
925 each group. \*  $p < 0.05$ , \*\*  $p < 0.01$ .

926 (F-H) Behavioural analysis of adult fish in the light-dark scototaxis test reveals that  
927 (F) whilst wild-type adults display a significant initial preference for the light part of  
928 the tank, *gr<sup>s357</sup>* mutants show no preference for either the light or the dark areas  
929 (repeated measures ANOVA, Genotype: time interaction:  $F=4.60$ ,  $d.f.=1,15$ ,  
930  $p=0.048$ ,  $N=7-8$  each genotype). Representative traces of (G) wild-type and (H)  
931 *gr<sup>s357</sup>* swimming in minute 1 of the light-dark scototaxis test. Values are expressed as  
932 means  $\pm$  s.e.m., \* indicates statistical differences in Tukey post-hoc analysis, \*  $p <$   
933  $0.05$ , \*\*  $p < 0.01$ , \*\*\*  $p < 0.001$ .  
934 (I-J) Behavioural analysis of adult fish in the novel tank diving test. (I) Adult  
935 *gr<sup>s357</sup>* mutant fish swim more slowly than wild-type adults (ANOVA with repeated  
936 measures: significant effect of genotype ( $F=7.38$ ,  $df=1,30$ ,  $p=0.011$ ,  $N=9$  each  
937 genotype). (J) Adult *gr<sup>s357</sup>* mutant fish are less exploratory than wild-type adults,  
938 exhibiting fewer entries to the upper compartment of the novel tank than wild-types.  
939 Values are expressed as means  $\pm$  s.e.m. A two-way ANOVA identified significant  
940 genotype:time interactions ( $F=6.57$ ,  $df=1,30$ ,  $p=0.016$ ,  $N=9$  each genotype), \*  $p <$   
941  $0.05$ , \*\*  $p < 0.01$ , \*\*\*  $p < 0.001$ .  
942 (K) *gr<sup>s357</sup>* mutant adult males have elevated whole body cortisol levels compared to  
943 their wild-type siblings (*t*-test,  $t=-3.26$ ,  $d.f.=4.05$ ,  $p=0.03$ ). Values are expressed as  
944 means  $\pm$  s.e.m.  $N=5$  each.  
945 (L) 5 d.p.f. *gr<sup>s357</sup>* mutant larvae have elevated whole body cortisol levels compared to  
946 wild type larvae (*t*-test,  $t=-3.30$ ,  $d.f.=13.31$ ,  $p=0.006$ ). Values are expressed as  
947 means  $\pm$  s.e.m.  $N=12$  each. \* indicates statistical differences in Tukey post-hoc  
948 analysis, \*  $p < 0.05$ , \*\*  $p < 0.01$ .  
949

950 **Figure 1 – Source data 1.** Source data for analysis of swimming speed and Nearest  
951 Neighbour Distances of wild-type and *gr<sup>s357</sup>* mutant larvae presented in Figures 1A  
952 and 1B.

953

954 **Figure 1 – Source data 2.** Source data for analysis of freezing duration, slow swim  
955 duration and thigmotaxis of wild-type and *gr<sup>s357</sup>* mutant adult zebrafish presented in  
956 Figures 1C, 1D and 1E.

957

958 **Figure 1 – Source data 3.** Source data for analysis of scototaxis behavior of wild-  
959 type and *gr<sup>s357</sup>* mutant adult zebrafish presented in Figure 1F.

960

961 **Figure 1 – Source data 4.** Source data for analysis of swimming speed and  
962 exploratory behaviour of wild-type and *gr<sup>s357</sup>* mutant adult zebrafish in the novel tank  
963 diving test as presented in Figures 1I and 1J.

964

965 **Figure 1 – Source data 5.** Source data for the analysis of whole body cortisol levels  
966 in wild-type and *gr<sup>s357</sup>* mutant adult zebrafish presented in Figure 1K.

967

968 **Figure 1 – Source data 6.** Source data for the analysis of whole body cortisol levels  
969 in wild-type and *gr<sup>s357</sup>* mutant larval zebrafish presented in Figure 1L.

970

971

972

973

974

975 **Figure 2**

976 ***Identification of Glucocorticoid Receptor-regulated DNA methylation sites in***  
977 ***the adult brain methylome***

978 To identify GR-sensitive, differentially methylated regions (GR-DMRs) within the  
979 zebrafish genome, the whole brain methylomes of two wild-type adult and two *gr<sup>s357</sup>*  
980 mutant males aged 13 months were completely sequenced and compared. A total of  
981 470,880,704 reads were obtained, of which 95.2% were high quality reads, and  
982 49.3% of these were mapped to the GRCz10 release 85 zebrafish reference  
983 genome. 99.15% of the genome was successfully bisulfite converted. Average  
984 coverage for all CpGs across the genome was 3.475. Average methylation level  
985 across the genome was 84.24% for wild types and 83.97% for *gr<sup>s357</sup>* mutants.

986 (A) DeepTools (v3.1.3) Heatmap showing the distribution of methylated CpGs within  
987 and flanking gene bodies in wild-type and *gr<sup>s357</sup>* mutant adult brain samples, covering  
988 the region from 5kb upstream of the Transcription Start site (TSS), to 5kb  
989 downstream of the Transcription Termination Site (TTS), for the 1448 genes for  
990 which there was >95% coverage of CpGs within the plotted region, in the adult brain  
991 samples analysed by WGBS. Deeper blue corresponds to a higher level of  
992 methylation. In both wild-type and *gr<sup>s357</sup>* mutant samples, gene bodies are typically  
993 highly methylated and promoters exhibit reduced or absent methylation, confirming  
994 that the global genomic DNA methylation patterns in the zebrafish brain samples  
995 analysed were similar to those described in other vertebrates.

996 (B) Histogram showing the frequency distribution of GR-DMRs identified by WGBS  
997 according to number of CpGs within the DMR. 171 of the 249 DMRs identified in the  
998 WGBS analysis comprised a single CpG, with an additional 55 DMRs comprising two  
999 CpGs, and the remaining 23 containing 3 or more clustered CpGs.

1000 (C) Plot of the number of CpGs within DMRs against the AreaStat measure of  
1001 differential methylation (mean +/- s.e.m.). Negative values indicate DMRs are  
1002 hypomethylated in the  $gr^{s357}$  mutant adult male brain compared to wild-type; positive  
1003 values indicate DMRs are hypermethylated in the  $gr^{s357}$  mutant adult male brain  
1004 compared to wild-type.

1005

## 1006 **Figure 2 – Source data 1**

### 1007 ***Differentially methylated regions identified in adult GR mutant brains using*** 1008 ***WGBS.***

1009 The bsseq software package was used to identify 249 genomic loci exhibiting  
1010 differential methylation in the brains of adult  $gr^{s357}$  mutant and wild-type sibling  
1011 males. N = 2 animals per genotype. 142 DMRs (57%) exhibited hypermethylation of  
1012 CpGs within the DMR in mutant compared to wild type brain samples. For the  
1013 remaining 107 DMRs (43%), the CpG(s) were hypomethylated in the  $gr^{s357}$  mutant  
1014 compared to wild-type brain samples. Each DMR was annotated with information  
1015 about their proximity to transcription units. 141 of these DMRs were located within  
1016 known genes (i.e. present in known exons or introns), with the remaining 109 DMRs  
1017 being located either upstream or downstream of known genes.

1018 Abbreviations: Chr – chromosome; Start – start position of DMR; End – end position  
1019 of DMR; idxStart, idxEnd, Cluster – ‘Internal use’; N – Number of CpGs in DMR;  
1020 Width – Width of DMR; Invdensity – Average length per locus; Areastat – sum of the  
1021  $t$ -statistics in each CpG (This is the area of the DMR, weighted by the number of  
1022 CpGs rather than by genomic length); maxStat – max  $t$ -statistic; meanDiff – The  
1023 mean difference in methylation level; the difference between group1.mean and  
1024 group2.mean ; Group1.mean – The mean methylation level across samples and loci



1025 in 'group1' :Mutant; Group2.mean – The mean methylation level across samples and  
1026 loci in 'group2' :wild type; Tstat.sd – standard deviation of *t*-statistics; Direction -  
1027 either 'hyper' or 'hypo' methylated.

1028

1029 **Figure 2 – Figure supplement 1**

1030 ***Gene Ontology (GO) analysis of GR-DMR associated genes in PANTHER.***

1031 In order to gain insight into the downstream biological pathways that might be  
1032 regulated by GR, Gene Ontology (GO) analysis using PANTHER was performed for  
1033 genes either lying adjacent to a DMR or within which a DMRs is located (Mi et al.,  
1034 2013). The PANTHER Over-representation Test identified 14 GO terms within the  
1035 Biological Process category that are significantly associated (False Discovery Rate <  
1036 0.05) with DMR-linked genes, showing a fold-enrichment of between 1.37 and 3.18  
1037 (Supplementary Table 1). Many of these terms are broadly relevant to the known  
1038 function of GR as a mediator of signalling pathway activity, suggesting that some of  
1039 identified DMRs could be involved in transcriptional regulation of GR target genes  
1040 with functions in the CNS.

1041

1042 **Figure 2 – Figure supplement 2**

1043 ***BisPCR<sup>2</sup> targeted bisulfite sequencing of DMRs identified via WGBS.***

1044 The mean number of sequence reads was calculated for each of the 11 DMRs  
1045 analysed by BisPCR<sup>2</sup> in the 10 wild-type and 10 *gr<sup>s357</sup>* mutant adult male brain  
1046 samples, indicating the gene name (first column), the genomic location (second  
1047 column) and mean number of amplicon reads in wild-type and *gr<sup>s357</sup>* mutant animals.

1048

1049

1050 **Figure 2 – Figure supplement 3**

1051 ***Differential methylation of individual CpGs in the *fkbp5*, *npepl1* and *aplp1* GR-***

1052 ***DMRs.*** Methylation levels at each CpG were compared in 10 wild-type and 10 *gr*<sup>s357</sup>

1053 mutant adult male brain samples for the *fkbp5*, *npepl1* and *aplp1* DMRs. A Mann-

1054 Whitney test with Sidak correction for multiple comparisons identified significantly

1055 differentially methylated CpGs. \* p<0.05, \*\* p<0.01, \*\*\* p<0.001 (n.s., not significant).

1056

1057 **Figure 2 – Figure supplement 4**

1058 ***BiSPCR<sup>2</sup> analysis of DNA methylation within a subset of GR-DMRs identified***

1059 ***by WGBS***

1060 (A-H) The percentage methylation of individual CpGs within a subset of high-ranking

1061 GR-DMRs identified in the WGBS analysis, was determined using the BisPCR<sup>2</sup>

1062 technique (Bernstein et al., 2015) in the brains of 10 wild-type and 10 *gr*<sup>s357</sup> mutant

1063 adult males aged 15 months. In addition to *fkbp5*, *npepl1* and *aplp1*, DMRs

1064 associated with the following genes were analysed: (A) *foxred2*, (B) *lpar6/ece2b*, (C)

1065 *chrn2a*, (D) *npy2rl*, (E) *stxbp5l*, (F) *dpp6a*, (G) *gna14*, (H) *ptger1c*. Histograms show

1066 mean percentage methylation +/- s.e.m. (n = 10 per genotype) in wild-type and *gr*<sup>s357</sup>

1067 mutant adult brains. An overall mean coverage of 4093 reads per amplicon was

1068 obtained, averaged across all samples subjected to BisPCR<sup>2</sup> analysis. Statistical

1069 analysis was performed using Mann-Whitney tests with Sidak correction, \* p<0.05, \*\*

1070 p<0.01, \*\*\* p<0.001. Details of the mean number of reads for each DMR are

1071 presented in Supplementary Table 2.

1072

1073 **Figure 2 – Figure supplement 4 – Source data 1.** Source data for the *BiSPCR<sup>2</sup>*

1074 *analysis of DNA methylation within a subset of GR-DMRs identified by WGBS*

1075 in wild-type and *gr<sup>s357</sup>* mutant zebrafish.

1076

1077

1078 **Figure 3**

1079 ***The Glucocorticoid Receptor regulates DNA methylation and transcription of***  
1080 ***fkbp5 in zebrafish***

1081 (A) The percentage methylation of each of the 4 CpGs within the *fkbp5* GR-DMR  
1082 identified in the WGBS analysis was determined using the BisPCR<sup>2</sup> technique, in the  
1083 brains of 10 wild-type (GR WT) and 10 *gr<sup>s357</sup>* homozygous mutant (GR mutant) adult  
1084 males (on the y-axis, 1.0 = 100%). Numbers on the x-axis indicate nucleotide  
1085 position on chromosome 6 (GRCz10 release 85). Histogram shows mean  
1086 percentage methylation +/- s.e.m. for each CpG in wild-type and *gr<sup>s357</sup>* mutant adult  
1087 brains. A mean coverage of 2813 and 3167 reads per sample was obtained for the  
1088 *fkbp5* amplicon in wild-type and *gr<sup>s357</sup>* mutant brains, respectively. Significant  
1089 differentially methylated CpGs were identified using the Mann-Whitney test with  
1090 Sidak correction for multiple comparisons. \*\* p<0.01, \*\*\* p<0.001.

1091 (B) qRT-PCR analysis of *fkbp5* transcript abundance in brains of wild-type and *gr<sup>s357</sup>*  
1092 homozygous mutant adult males. Transcript abundance was normalized to levels of  
1093 beta actin transcription, values are displayed as means +/- s.e.m., n = 7. Statistical  
1094 analysis by *t*-test revealed significantly decreased *fkbp5 transcript* abundance in the  
1095 brains of *gr<sup>s357</sup>* mutant compared to wild-type adult males. \*\*\*\* p<0.0001.

1096 (C) BisPCR<sup>2</sup> analysis of DNA methylation at the 4 CpG dinucleotides within the  
1097 *fkbp5* GR-DMR in wild-type and *gr<sup>s357</sup>* homozygous mutant 256-cell stage blastulae.  
1098 Histograms show mean percentage methylation +/- s.e.m. (12 pools of 50 blastulae

1099 per pool). A Mann-Whitney test revealed no statistically significant differences in  
1100 mean percentage methylation at any of the 4 CpGs within the GR-DMR.  
1101 (D) BisPCR<sup>2</sup> analysis of DNA methylation at the 4 CpG dinucleotides within the  
1102 *fkbp5* GR-DMR in dissected head tissue of individual wild-type and *gr<sup>s357</sup>*  
1103 homozygous mutant larvae, maintained overnight for 16 hours until they reached 5  
1104 d.p.f., in the presence (GR WT-BM, GR mutant-BM) or absence (GR WT, GR  
1105 mutant) of 100 $\mu$ M betamethasone. Histograms show mean percentage methylation  
1106 +/- s.e.m. (n = 24 larvae per genotype/treatment group). A Mann-Whitney test with  
1107 Sidak correction for multiple comparisons revealed statistically significant differences  
1108 in mean percentage methylation at CpGs: 6: 41099291, 6: 41099420 and 6:  
1109 41099447. \* p<0.05, \*\*\* p<0.001.  
1110 (E) qRT-PCR analysis of *fkbp5* mRNA levels in 3 d.p.f. and 5 d.p.f. wild-type and  
1111 *gr<sup>s357</sup>* homozygous mutant larvae maintained in E3 medium only (untreated), E3  
1112 medium containing 100 $\mu$ M betamethasone for 2 hours. Histograms show mean  
1113 transcript abundance +/- s.e.m relative to  $\beta$ -*actin*, normalized to the wild-type control  
1114 group (n = 6 pools of 20 larvae per genotype/treatment group). A two-way ANOVA  
1115 identified statistically significant differences in transcript abundance: \*\* p<0.01, \*\*\*  
1116 p<0.001.  
1117 (F) Whole mount *in situ* hybridisation analysis of *fkbp5* transcript levels in 5 d.p.f.  
1118 wild-type and *gr<sup>s357</sup>* (*nr3c1* -/-) mutant larvae reveals weak *fkbp5* expression in  
1119 untreated wild-type larvae, strong *fkbp5* expression in wild-type larvae treated with  
1120 100 $\mu$ M betamethasone for 2 hours, and a complete absence of *fkbp5* transcripts in  
1121 both untreated and betamethasone-treated *gr<sup>s357</sup>* mutants. Images are typical of each  
1122 genotype / treatment group, ~ 30 larvae per group.  
1123

1124 **Figure 3 – Source data 1.** Source data for the analysis of DNA methylation at the  
1125 *fkbp5* GR-DMR in wild-type and *gr<sup>s357</sup>* mutant zebrafish presented in Figures 3A, 3C  
1126 and 3D.

1127

1128 **Figure 3 – Source data 2.** Source data for the analysis of *fkbp5* transcript  
1129 abundance in wild-type and *gr<sup>s357</sup>* mutant zebrafish presented in Figures 3B and 3E.

1130

1131 **Figure 3 – Figure supplement 1**

1132 ***The Glucocorticoid Receptor regulates DNA methylation and transcription of***  
1133 ***npepl1 in the zebrafish adult brain.***

1134 (A) The percentage methylation of each of the 5 CpGs within the *npepl1* GR-DMR  
1135 identified in the WGBS analysis was determined using the BisPCR<sup>2</sup> technique, in the  
1136 brains of 10 wild-type (GR WT) and 10 *gr<sup>s357</sup>* homozygous mutant (GR mutant) adult  
1137 males (on the y-axis, 1.0 = 100%). Numbers on the x-axis indicate nucleotide  
1138 position on chromosome 6 (GRCz10 release 85). Histogram shows mean  
1139 percentage methylation +/- s.e.m. for each CpG in wild-type and *gr<sup>s357</sup>* mutant adult  
1140 brains. A mean coverage of 3453 and 2443 reads per sample was obtained for the  
1141 *npepl1* amplicon in wild-type and *gr<sup>s357</sup>* mutant brains, respectively. Significant  
1142 differentially methylated CpGs were identified using the Mann-Whitney test with  
1143 Sidak correction for multiple comparisons. \* p<0.05.

1144 (B) qRT-PCR analysis of GR-DMR-associated *npepl1* transcript abundance in wild-  
1145 type and *gr<sup>s357</sup>* mutant adult male brains. Transcript abundance was normalized to  
1146 levels of beta actin transcription, values are displayed as means +/- s.e.m., n = 7.  
1147 Statistical analysis by *t*-test revealed a modest but significant reduction in *npepl1*

1148 transcript abundance in the brains of *gr<sup>s357</sup>* mutant compared to wild-type adult  
1149 males. \*\*\*  $p < 0.001$ .

1150

### 1151 **Figure 3 – Figure supplement 1 – Source data 1**

1152 Source data for the analysis of DNA methylation at the *npepl1* GR-DMR and *npepl1*  
1153 transcript abundance, in wild-type and *gr<sup>s357</sup>* mutant zebrafish, as presented in  
1154 Figures Figure 3-supplement 1A and 1B, respectively.

1155

1156

### 1157 **Figure 4**

1158 ***The Glucocorticoid Receptor regulates DNA methylation and transcription of***  
1159 ***aplp1 in zebrafish***

1160 (A) The percentage methylation of each of the 6 CpGs within the *aplp1* GR-DMR  
1161 identified in the WGBS analysis was determined using the BisPCR<sup>2</sup> technique in the  
1162 brains of 10 wild-type (GR WT) and 10 *gr<sup>s357</sup>* homozygous mutant (GR mutant) adult  
1163 males. Numbers on the x-axis indicate nucleotide position on chromosome 15  
1164 (GRCz10 release 85). Histogram shows mean percentage methylation +/- s.e.m. for  
1165 each CpG in wild-type and *gr<sup>s357</sup>* mutant adult brains. On average, a mean coverage  
1166 of 7881 and 7125 reads per sample were obtained for the *aplp1* amplicon in wild-  
1167 type and *gr<sup>s357</sup>* mutant brains, respectively. Significant differentially methylated CpGs  
1168 were identified using the Mann-Whitney test with Sidak correction for multiple  
1169 comparisons. \*  $p < 0.05$ , \*\*  $p < 0.01$ , \*\*\*  $p < 0.001$ .

1170 (B) qRT-PCR analysis of *aplp1* mRNA abundance in the brains of wild-type and  
1171 *gr<sup>s357</sup>* homozygous mutant adult males. mRNA abundance was normalized to levels  
1172 of beta actin transcripts, values are displayed as means +/- s.e.m.,  $n = 7$ . Statistical

1173 analysis by *t*-test revealed significantly increased *aplp1* transcript abundance in the  
1174 brains of *gr<sup>s357</sup>* mutant compared to wild-type adult males. \*\*  $p < 0.01$ , \*\*\*  $p < 0.001$ ,  
1175 \*\*\*\*  $p < 0.0001$ .

1176 (C) BisPCR<sup>2</sup> analysis of DNA methylation within the *aplp1* GR-DMR in wild-type and  
1177 *gr<sup>s357</sup>* homozygous mutant 256-cell stage blastulae. Histograms show mean  
1178 percentage methylation +/- s.e.m. (12 pools of 50 blastulae per pool). A Mann-  
1179 Whitney test revealed no statistically significant differences in mean percentage  
1180 methylation at any of the 6 CpGs within the GR-DMR.

1181 (D) BisPCR<sup>2</sup> analysis of DNA methylation at the 6 CpG dinucleotides within the  
1182 *aplp1* GR-DMR in dissected head tissue of individual 5 d.p.f. wild-type and *gr<sup>s357</sup>*  
1183 homozygous mutant larvae, maintained overnight for 16 hours until they reached 5  
1184 d.p.f., in the presence (GR WT-BM, GR mutant-BM) or absence (GR WT, GR  
1185 mutant) of 100 $\mu$ M betamethasone, prior to DNA extraction. Histograms show mean  
1186 percentage methylation +/- s.e.m. ( $n = 24$  larvae per genotype/treatment group). A  
1187 Mann-Whitney test with Sidak correction for multiple comparisons revealed no  
1188 statistically significant differences in mean percentage methylation at any of the six  
1189 CpGs within the GR-DMR.

1190 (E) qRT-PCR analysis of *aplp1* mRNA levels in 3 d.p.f. and 5 d.p.f. wild-type and  
1191 *gr<sup>s357</sup>* homozygous mutant larvae maintained in E3 medium only (untreated), or E3  
1192 medium containing 100 $\mu$ M betamethasone for 2 hours. Histograms show mean  
1193 transcript abundance +/- s.e.m relative to  *$\beta$ -actin*, normalized to the wild-type control  
1194 group ( $n = 6$  pools of 20 larvae per genotype/treatment group). A two-way ANOVA  
1195 identified statistically significant differences in transcript abundance: \*  $p < 0.05$ , \*\*\*  
1196  $p < 0.001$ , \*\*\*\*  $p < 0.0001$ .

1197 (F) Whole mount *in situ* hybridisation analysis of *aplp1* transcript levels in 5 d.p.f.  
1198 wild-type and *gr*<sup>s357</sup> mutant (*nr3c1* -/-) larvae maintained in E3 medium only  
1199 (untreated), E3 medium containing 100µM betamethasone for 2 hours reveals  
1200 modest *aplp1* expression in the untreated wild-type and *gr*<sup>s357</sup> mutant larval brain,  
1201 and a considerable increase in transcript abundance in betamethasone-treated wild-  
1202 type larvae, which was not observed in betamethasone-treated *gr*<sup>s357</sup> mutant larvae.  
1203 Images are typical of each genotype / treatment group, ~ 30 larvae per group.

1204  
1205 **Figure 4 – Source data 1.** Source data for the analysis of DNA methylation at the  
1206 *aplp1* GR-DMR in wild-type and *gr*<sup>s357</sup> mutant zebrafish presented in Figures 4A, 4C  
1207 and 4D.

1208  
1209 **Figure 4 – Source data 2.** Source data for the analysis of *aplp1* transcript  
1210 abundance in wild-type and *gr*<sup>s357</sup> mutant zebrafish presented in Figures 4B and 4E.

1211  
1212  
1213 **Figure 5**

1214 ***Small molecule inhibitors of FKBP5 function enhance GR-dependent***  
1215 ***glucocorticoid-induced transcription of *fkbp5* mRNA but have no effect on GR-***  
1216 ***dependent, glucocorticoid-induced transcription of *aplp1*.***

1217 (A, B) Triplicate pools of wild-type (GR WT) and *gr*<sup>s357</sup> homozygous mutant (GR  
1218 mutant) larvae (20 larvae per pool, 4 d.p.f.) were exposed to E3 medium only or E3  
1219 medium containing 1µM FK506 for one hour before being transferred to E3 medium  
1220 containing 0, 5, 10, 20, 50 or 100µM betamethasone with or without 1µM FK506, and  
1221 incubated for a further two hours. RNA was then extracted and subjected to qRT-



1222 PCR analysis to quantify abundance of (A) *fkbp5* and (B) *aplp1* mRNAs, normalized  
1223 to levels of beta actin mRNA. Values are expressed as means +/- s.e.m. A two-way  
1224 ANOVA identified statistically significant differences in transcript abundance: \*\*\*\*  
1225  $p < 0.0001$ . The presence of  $1 \mu\text{M}$  FK506 elicited a betamethasone concentration-  
1226 dependent increase in *fkbp5* transcript abundance, but did not affect the  
1227 betamethasone concentration-dependent abundance of *aplp1* transcripts.  
1228 (C, D) Triplicate pools of wild-type and *gr<sup>s357</sup>* homozygous mutant larvae (20 larvae  
1229 per pool, 4 d.p.f.) were exposed to E3 medium only or E3 medium containing  $0.1 \mu\text{M}$   
1230 SAFit2 for one hour before being transferred to E3 medium containing 0, 5, 10, 20,  
1231 50 or  $100 \mu\text{M}$  betamethasone with or without  $0.1 \mu\text{M}$  SAFit2, and incubated for a  
1232 further two hours. RNA was then extracted and subjected to qRT-PCR analysis to  
1233 quantify abundance of (C) *fkbp5* and (D) *aplp1* transcripts, normalized to levels of  
1234 beta actin mRNA. Values are expressed as means +/- s.e.m. A two-way ANOVA  
1235 identified statistically significant differences in transcript abundance: \*  $p < 0.05$ , \*\*\*  
1236  $p < 0.001$ , \*\*\*\*  $p < 0.0001$ . The presence of  $0.1 \mu\text{M}$  SAFit2 elicited a betamethasone  
1237 concentration-dependent increase in *fkbp5* transcript abundance but did not affect  
1238 the betamethasone concentration-dependent abundance of *aplp1* transcripts.

1239

1240 **Figure 5 – Source data 1.** Source data for the analysis of glucocorticoid-induced  
1241 transcription of *fkbp5* and *aplp1* in wild-type and *gr<sup>s357</sup>* mutant zebrafish larvae in the  
1242 presence or absence of FKBP5 protein inhibitors, as presented in Figures 5A, 5B,  
1243 5C and 5D.

1244

1245

1246

1247 **Figure 6**

1248 **The synaptic vesicle docking protein, Syntaxin Binding Protein 1A (Stxbp1a),**  
1249 **is required for neural activity in the larval zebrafish brain.**

1250 (A) Whole-mount *in situ* hybridisation analysis of *stxbp1a* transcript distribution in  
1251 wild-type zebrafish embryos and larvae at 1 d.p.f (n=22), 2 d.p.f. (n=14) and 3 d.p.f.  
1252 (n=23). Dorsal views of embryonic and larval heads. *stxbp1a* is expressed  
1253 specifically in the developing brain and spinal cord, and also in specific layers of  
1254 retinal cells in 3 d.p.f. larvae.

1255 (B) Nucleotide sequences at the Exon 8 / Intron 8-9 boundary within the zebrafish  
1256 *stxbp1a* gene before and after targeted mutagenesis by CRISPR/Cas9. Underlined  
1257 purple and green nucleotides in the wild-type *stxbp1a* sequence are deleted in the  
1258 *stxbp1a<sup>sh438</sup>* mutant allele and replaced with a shorter sequence of nucleotides in  
1259 red. The mutation removes the Exon 8 / Intron 8-9 splice donor site, extending the  
1260 open reading frame into Intron 8-9 that is terminated prematurely.

1261 (C) Homozygosity for a loss of function mutation in *stxbp1a* abolishes baseline  
1262 locomotor activity and convulsive locomotor behaviour in 3 d.p.f. larvae exposed to  
1263 5mM Pentylenetetrazole (PTZ), a chemical convulsant. Homozygous *stxbp1a*  
1264 mutants carrying two copies of the *sh438* allele (Mutant) are completely immotile  
1265 whereas sibling larvae (WT, includes both phenotypically wild-type *stxbp1a<sup>sh438</sup>*  
1266 heterozygotes and homozygous wild-type larvae) exhibit modest baseline locomotor  
1267 movements and robust locomotor activity when exposed to 5mM PTZ. Values are  
1268 expressed as means +/- s.e.m. A two-way ANOVA reveals a significant  
1269 treatment:genotype interaction. F=22.8, d.f.=1,44, p=<0.0001, N=8-15, \*\*\* p<0.0001  
1270 compared to all groups in Tukey post-hoc analysis.

1271 (D) Electrophysiological patch clamp analysis of individual spinal neurones from 4  
1272 d.p.f. phenotypically wild-type sibling (left column, n= 1) and *stxbp1a<sup>sh438</sup>*  
1273 homozygous mutant (right column, n = 3) larvae. Top row: examples of baseline  
1274 neuronal firing in untreated larvae; middle row: examples of convulsant-induced  
1275 neuronal firing in PTZ-treated larvae; bottom row: neuronal firing induced by current  
1276 injection into patch-clamped neurons. Spinal neurones of sibling larvae exhibited  
1277 baseline firing (top left), which was increased by PTZ treatment (middle left), in  
1278 contrast to neurones of *stxbp1a<sup>sh438</sup>* homozygous mutant larvae, which exhibited  
1279 negligible neuronal firing both in the presence (middle right) and absence (top right)  
1280 of PTZ, although current injection was able to bypass the need for synaptic  
1281 neurotransmission and elicit neuronal firing in both sibling (bottom left) and  
1282 *stxbp1a<sup>sh438</sup>* mutant (bottom right) larvae.

1283 (E) Plots of fluorescence of *Tg(Xla.Tubb:GCaMP3)<sup>sh344</sup>*-derived GCaMP3 calcium  
1284 reporter over time (Bergmann et al., 2018) in the presence and absence of *stxbp1a*  
1285 function. 3 d.p.f. transgenic larvae that were either phenotypically wild-type sibling  
1286 (motile) or homozygous for the *stxbp1a<sup>sh438</sup>* mutant allele (immotile) were imaged for  
1287 a period of 5 minutes on a Zeiss Light sheet microscope. Imaging data was  
1288 processed and analysed with an in-house algorithm to measure GCaMP3  
1289 fluorescence levels within the brain over the 5 minute time period. Data is plotted to  
1290 show GCaMP3 fluorescence intensity of an equivalent z-slice over time for each  
1291 imaged sibling (n=6) and homozygous *stxbp1a<sup>sh438</sup>* mutant (n=5) larval brain. See  
1292 Figure 6-video 1 and Figure 6-video 2 for examples of imaged sibling and  
1293 homozygous *stxbp1a<sup>sh438</sup>* mutant larvae, respectively.

1294 (F) Whole-mount *in situ* hybridisation analysis of neuronal immediate-early gene *cfos*  
1295 transcription pattern in the brain of 3 d.p.f. *stxbp1a<sup>sh438</sup>* homozygous mutant (right

1296 column) and phenotypically wild-type sibling (left column) larvae cultured in E3  
1297 medium only (top row) or E3 medium containing 20mM PTZ convulsant agent  
1298 (bottom row). An extensive domain of robust PTZ-induced transcription of *cfos* by  
1299 PTZ is evident in the brain of siblings (n=17), whereas only a small domain of  
1300 *stxbp1a*-independent, PTZ-induced transcription of *cfos* is visible in the  
1301 telencephalon of *stxbp1a*<sup>sh438</sup> homozygous mutant larvae (n=6), where the paralogue  
1302 of *stxbp1a*, *stxbp1b*, is specifically expressed (Grone et al., 2016). No *cfos*  
1303 transcripts were detectable in untreated sibling (n=16) or *stxbp1a*<sup>sh438</sup> homozygous  
1304 mutant larvae (n=4).

1305

1306 **Figure 6 – Source data 1.** Source data for analysis of locomotor movement by wild-  
1307 type sibling and homozygous *stxbp1a*<sup>sh438</sup> mutant larvae in the presence and  
1308 absence of PTZ, as presented in Figure 6C.

1309

1310 **Figure 6 – video 1.** Example video recording of GCaMP3 fluorescence in brain of 3  
1311 d.p.f. wild-type sibling *Tg(Xla.Tubb:GCaMP3)*<sup>sh344</sup> transgenic larva, as analysed in  
1312 Figure 6E.

1313

1314 **Figure 6 – video 2.** Example video recording of GCaMP3 fluorescence in brain of 3  
1315 d.p.f. homozygous *stxbp1a*<sup>sh438</sup> mutant *Tg(Xla.Tubb:GCaMP3)*<sup>sh344</sup> transgenic larva,  
1316 as analysed in Figure 6E.

1317

1318

1319

1320

1321 **Figure 7**

1322 ***stxbp1a* acts downstream of glucocorticoid signalling to facilitate transcription**  
1323 **of *aplp1* but not *fkbp5*, and has no impact on DNA methylation at either the**  
1324 ***aplp1* or *fkbp5* GR-DMRs in larval head tissue.**

1325 (A, B) Triplicate pools of 4 d.p.f. sibling (*Stxbp1a* sibling) and *stxbp1a*<sup>sh438</sup>  
1326 homozygous mutant (*Stxbp1a* <sup>-/-</sup>) larvae (20 larvae per pool) were exposed to E3  
1327 medium only or E3 containing 0.1 μM SAFit2 for one hour before being transferred to  
1328 E3 medium containing 0, 5, 10, 20, 50 or 100 μM betamethasone with or without  
1329 0.1 μM SAFit2, and incubated for a further two hours. RNA was then extracted from  
1330 each pool and subjected to qRT-PCR analysis to quantify abundance of (A) *aplp1*  
1331 and (B) *fkbp5* transcripts, normalized to levels of beta actin mRNA. Values are  
1332 expressed as means +/- s.e.m. A two-way ANOVA identified statistically significant  
1333 differences in transcript abundance: \*\* p<0.01, \*\*\* p<0.001, \*\*\*\* p<0.0001. The  
1334 presence of 0.1 μM SAFit2 elicited a betamethasone concentration-dependent  
1335 increase in *fkbp5* transcript abundance but did not affect the betamethasone  
1336 concentration-dependent abundance of *aplp1* transcripts. Thus in (A), *stxbp1a* is  
1337 required for betamethasone-mediated induction of *aplp1* transcription, which is  
1338 strictly insensitive to the Fkbp5 inhibitor, SAFit2. In (B), *stxbp1a* is dispensable for  
1339 the betamethasone-mediated induction of *fkbp5* transcription, which is greatly  
1340 enhanced by the Fkbp5 inhibitor, SAFit2, in the presence or absence of *stxbp1a*  
1341 function.

1342 (C) BisPCR<sup>2</sup> analysis of DNA methylation at the *aplp1* GR-DMR in dissected head  
1343 tissue of 4 d.p.f. betamethasone-treated and untreated wild-type sibling and  
1344 *stxbp1a*<sup>sh438</sup> homozygous mutant larvae (n=24 individual larval heads per  
1345 genotype/treatment group). Histogram shows mean percentage methylation for each

1346 CpG +/- s.e.m. A Mann-Whitney test revealed no statistically significant differences  
1347 in mean percentage methylation at any of the 6 CpGs within the GR-DMR.  
1348 (D) DNA methylation analysis at the *fkbp5* GR-DMR in 4 d.p.f. betamethasone-  
1349 treated and untreated wild-type sibling and *stxbp1a<sup>sh438</sup>* homozygous mutant larvae  
1350 (n=24 individual larval heads per genotype/treatment group). Histogram shows mean  
1351 percentage methylation for each CpG +/- s.e.m. Significant differentially methylated  
1352 CpGs were identified using the Mann-Whitney test with Sidak correction for multiple  
1353 comparisons. \*\* p<0.01, \*\*\* p<0.001.  
1354 (E, F) Five pools of 4 d.p.f. wild-type and homozygous *gr<sup>s357</sup>* mutant larvae (20  
1355 larvae per pool) were exposed to E3 medium only or E3 medium containing 20mM  
1356 PTZ for 90 minutes. RNA was then extracted from whole larvae and subjected to  
1357 qRT-PCR to quantify (E) *fkbp5* transcript abundance, and (F) *aplp1* transcript  
1358 abundance. Transcription of *fkbp5* was not induced by exposure to PTZ, and basal  
1359 transcription was GR-dependent (E), whereas PTZ robustly induced transcription of  
1360 *aplp1*, which was independent of GR function (F) Values are expressed as means  
1361 +/- s.e.m. A two-way ANOVA identified statistically significant differences in  
1362 transcript abundance, \* p<0.05

1363

1364 **Figure 7 – Source data 1.** Source data for the analysis of glucocorticoid-induced  
1365 transcription of *fkbp5* and *aplp1* in wild-type sibling and *stxbp1a<sup>sh438</sup>* homozygous  
1366 mutant zebrafish larvae, in the presence or absence of the FKBP5 protein inhibitor  
1367 SAFit2, as presented in Figures 7A and 7B.

1368

1369 **Figure 7 – Source data 2.** Source data for the analysis of DNA methylation at the  
1370 *aplp1* and *fkbp5* GR-DMRs in wild-type sibling and *stxbp1a<sup>sh438</sup>* homozygous mutant  
1371 zebrafish larvae, as presented in Figures 7C and 7D.

1372

1373 **Figure 7 – Source data 3.** Source data for the analysis of *fkbp5* and *aplp1* transcript  
1374 abundance in wild-type and homozygous *gr<sup>s357</sup>* mutant larvae maintained in the  
1375 presence or absence of PTZ, as presented in Figures 7E and 7F.

1376

1377

1378 **Figure 8**

1379 **GR regulates expression of genes encoding metabotropic glutamate receptors**  
1380 **in zebrafish.**

1381 (A) qRT-PCR analysis of *grm2a*, *grm2b*, *grm3* and *grm5a* mRNA abundance in the  
1382 brains of wild-type (GR WT) and homozygous *gr<sup>s357</sup>* mutant (GR mutant) adult  
1383 males. mRNA abundance was normalized to levels of beta actin mRNA, values are  
1384 displayed as means +/- s.e.m., n = 7. Statistical analysis by *t*-test revealed  
1385 significantly decreased abundance of *grm2a*, and *grm2b* transcripts, and  
1386 significantly increased abundance of *grm5a* transcripts, in the brains of *gr<sup>s357</sup>* mutant  
1387 compared to wild-type adult males. \*\*  $p < 0.01$ , \*\*\*  $p < 0.001$ . Thus, GR promotes co-  
1388 ordinate expression of *grm2a* and *grm2b* and attenuates expression of *grm5a* in the  
1389 zebrafish adult brain.

1390 (B) qRT-PCR analysis of *grm2a*, *grm2b*, *grm3* and *grm5a* mRNA abundance in 5  
1391 d.p.f. wild-type and homozygous *gr<sup>s357</sup>* mutant larvae maintained in E3 medium only  
1392 (untreated), or E3 medium containing 100 $\mu$ M betamethasone for 2 hours.

1393 Histograms show mean mRNA abundance +/- s.e.m., n = 5 pools of 20 larvae per

1394 genotype/treatment group. A two-way ANOVA identified statistically significant  
1395 differences in transcript abundance: \*  $p < 0.05$ , \*\*  $p < 0.01$ , \*\*\*  $p < 0.001$ . Thus, GR is  
1396 required for glucocorticoid-induced transcription of *grm2a*, *grm2b*, *grm3* and for  
1397 glucocorticoid-mediated inhibition of *grm5a* transcription.

1398 (C) qRT-PCR analysis of *grm2a*, *grm2b*, *grm3* and *grm5a* mRNA abundance in 4  
1399 d.p.f. phenotypically wild-type sibling (*stxbp1a<sup>sh438</sup>* sibling) and homozygous  
1400 *stxbp1a<sup>sh438</sup>* mutant (*stxbp1a<sup>sh438</sup> -/-*) larvae maintained in E3 medium only  
1401 (untreated), or E3 medium containing 100 $\mu$ M betamethasone for 2 hours.

1402 Histograms show mean mRNA abundance  $\pm$  s.e.m.,  $n = 5$  pools of 20 larvae per  
1403 group. A two-way ANOVA identified statistically significant differences in transcript  
1404 abundance: \*  $p < 0.05$ , \*\*  $p < 0.01$ , \*\*\*  $p < 0.001$ . Thus, *Stxbp1a* is dispensable for  
1405 glucocorticoid-induced transcription of *grm2a*, *grm2b*, *grm3* and essential for  
1406 glucocorticoid-independent transcription of *grm5a*.

1407

1408 **Figure 8 – Source data 1.** Source data for the analysis of *grm2a*, *grm2b*, *grm3* and  
1409 *grm5a* transcript abundance in brains of wild-type (GR WT) and homozygous *gr<sup>s357</sup>*  
1410 mutant (GR mutant) adult zebrafish, as presented in Figure 8A.

1411

1412 **Figure 8 – Source data 2.** Source data for the analysis of *grm2a*, *grm2b*, *grm3* and  
1413 *grm5a* transcript abundance in wild-type (GR WT) and homozygous *gr<sup>s357</sup>* mutant  
1414 (GR mutant) zebrafish larvae maintained in the presence or absence of  
1415 betamethasone, as presented in Figure 8B.

1416

1417 **Figure 8 – Source data 3.** Source data for the analysis of *grm2a*, *grm2b*, *grm3* and  
1418 *grm5a* transcript abundance in wild-type sibling (*stxbp1a<sup>sh438</sup>* sibling) and



1419 homozygous *stxbp1a*<sup>sh438</sup> mutant (*stxbp1a*<sup>sh438</sup> -/-) larvae maintained in the presence  
1420 or absence of betamethasone, as presented in Figure 8B.

1421

1422

1423 **Figure 9**

1424 **Roles for Group I and Group II metabotropic glutamate receptors in regulating**  
1425 **synaptic activity-dependent transcription of *aplp1* downstream of GR function.**

1426 (A,B) qRT-PCR analysis of *aplp1* mRNA abundance in 4 d.p.f. (A) wild-type (GR WT)  
1427 and *gr*<sup>s357</sup> homozygous mutant (GR mutant) larvae or (B) sibling and *stxbp1a*<sup>sh438</sup>  
1428 mutant larvae. Larvae were first incubated in either DMSO vehicle only, 1 $\mu$ M Group  
1429 II Grm agonist LY354470, 10 $\mu$ M Grm5a antagonist SIB1893, or the combination of  
1430 1 $\mu$ M LY354470 and 10 $\mu$ M SIB1893 for 1 hour. After 1 hour, either ethanol vehicle or  
1431 betamethasone (from a 10mM stock in ethanol) to a final concentration of 100 $\mu$ M  
1432 was added, and larvae were incubated for a further 2 hours, after which they were  
1433 then collected for RNA extraction prior to qRT-PCR analysis. In (A) and (B),  
1434 histograms show mean *aplp1* transcript abundance for each genotype/treatment  
1435 group combination +/- s.e.m., relative to that for wild-type larvae incubated in both  
1436 DMSO and ethanol vehicles; n = 3 pools of 20 larvae per group. A two-way ANOVA  
1437 identified statistically significant differences in transcript abundance: \* p<0.05, \*\*  
1438 p<0.01, \*\*\* p<0.001

1439

1440 **Figure 9 – Source data 1.** Source data for the analysis of *aplp1* transcript  
1441 abundance in (Figure 9 A) wild-type (GR WT) and homozygous *gr*<sup>s357</sup> mutant (GR  
1442 mutant) zebrafish larvae, or (Figure 9B) wild-type sibling (*stxbp1a*<sup>sh438</sup> sibling) and  
1443 homozygous *stxbp1a*<sup>sh438</sup> mutant (*stxbp1a*<sup>sh438</sup> -/-) larvae maintained in the presence

1444 or absence of betamethasone, and the presence or absence of LY354740 and/or  
1445 SIB1893.

1446

1447

1448 **Figure 10**

1449 **Identification of potential binding sites for GR in the *fkbp5* promoter and other**  
1450 **transcription factors in the *fkbp5* and *aplp1* GR-DMRs.**

1451 Binding sites for GR and other transcription factors in the *fkbp5* promoter (top), *fkbp5*  
1452 GR-DMR (middle), and *aplp1* GR-DMR (bottom), were identified using the JASPAR  
1453 tool. Three distinct GR binding sites within the *fkbp5* promoter are indicated in green,  
1454 red and blue. CpGs within the *fkbp5* and *aplp1* GR-DMRs are indicated in red.

1455

1456

1457 **Figure 11**

1458 **Schematic overview of the GR-Grm-Stxbp1a-Aplp1 pathway at the synapse**

1459 Glucocorticoid-bound GR enters the nuclei of pre-synaptic neurons in the zebrafish  
1460 larval brain and activates transcription of *fkbp5* and the Group II metabotropic  
1461 glutamate receptor genes *grm2a*, *grm2b* and *grm3*, which modulate Stxbp1a-  
1462 dependent synaptic activity. Glucocorticoid-dependent modulation of synaptic activity  
1463 then enhances transcription of *aplp1* and attenuates expression of *grm5a* in  
1464 postsynaptic neurons. Thus, glucocorticoid-dependent activation of the GR-Grm-  
1465 Stxbp1a-Aplp1 pathway modulates signalling across synapses that could facilitate  
1466 their adaptive remodeling.

1467

1468

1469

1470 **Figures**  
1471

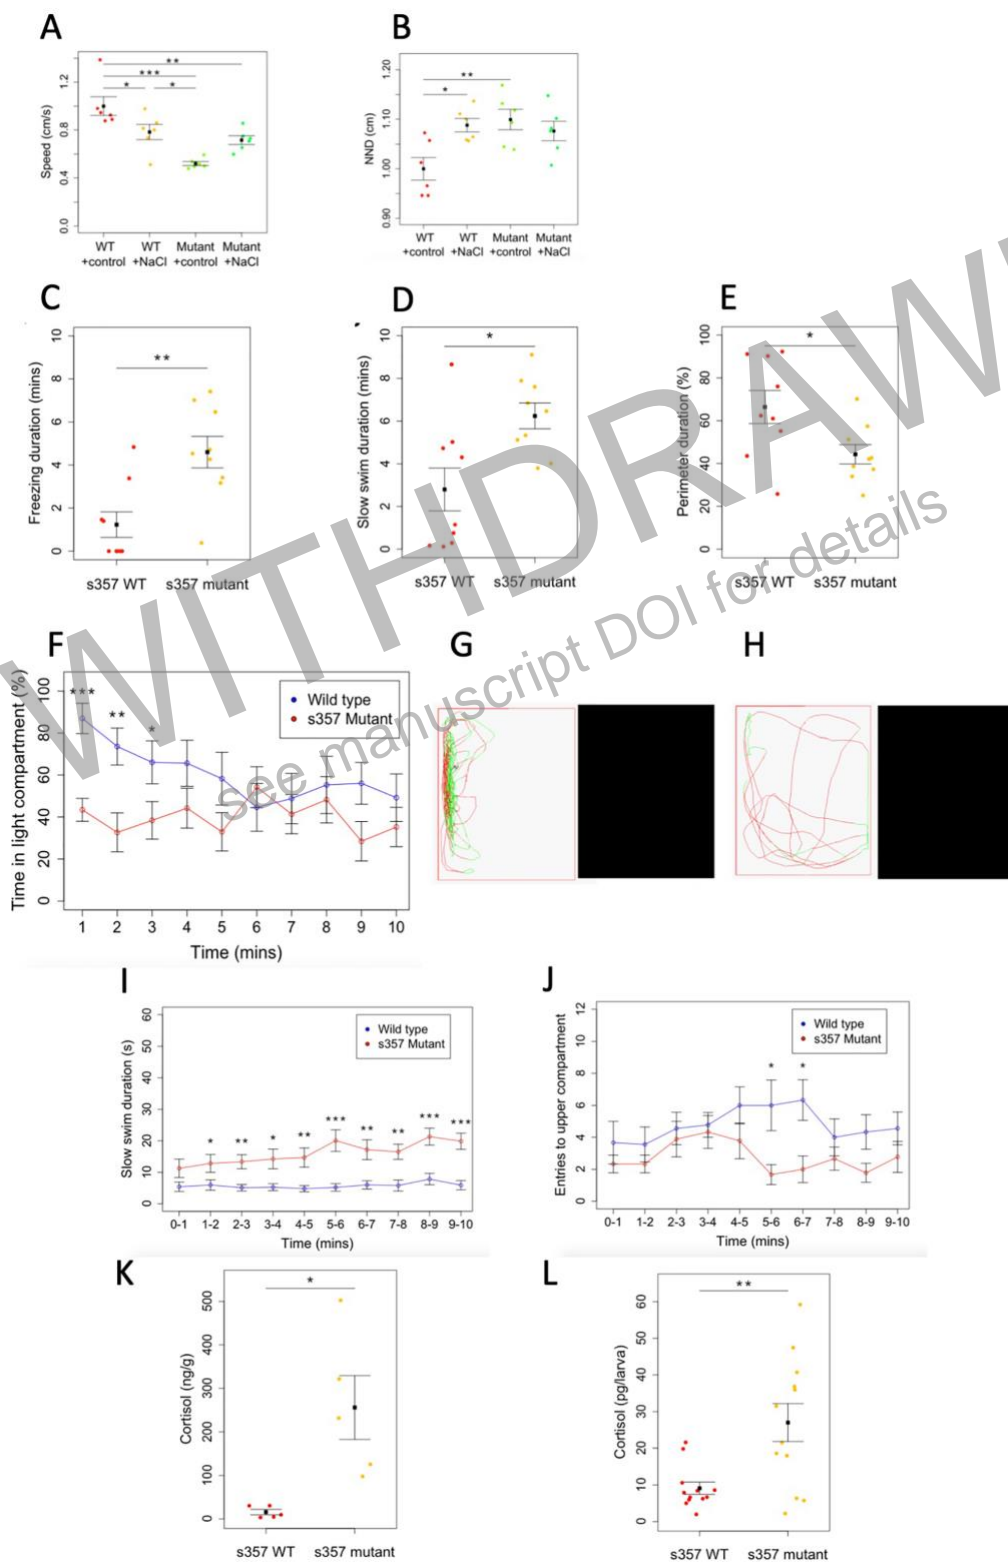

1472

1473

**Figure 1**

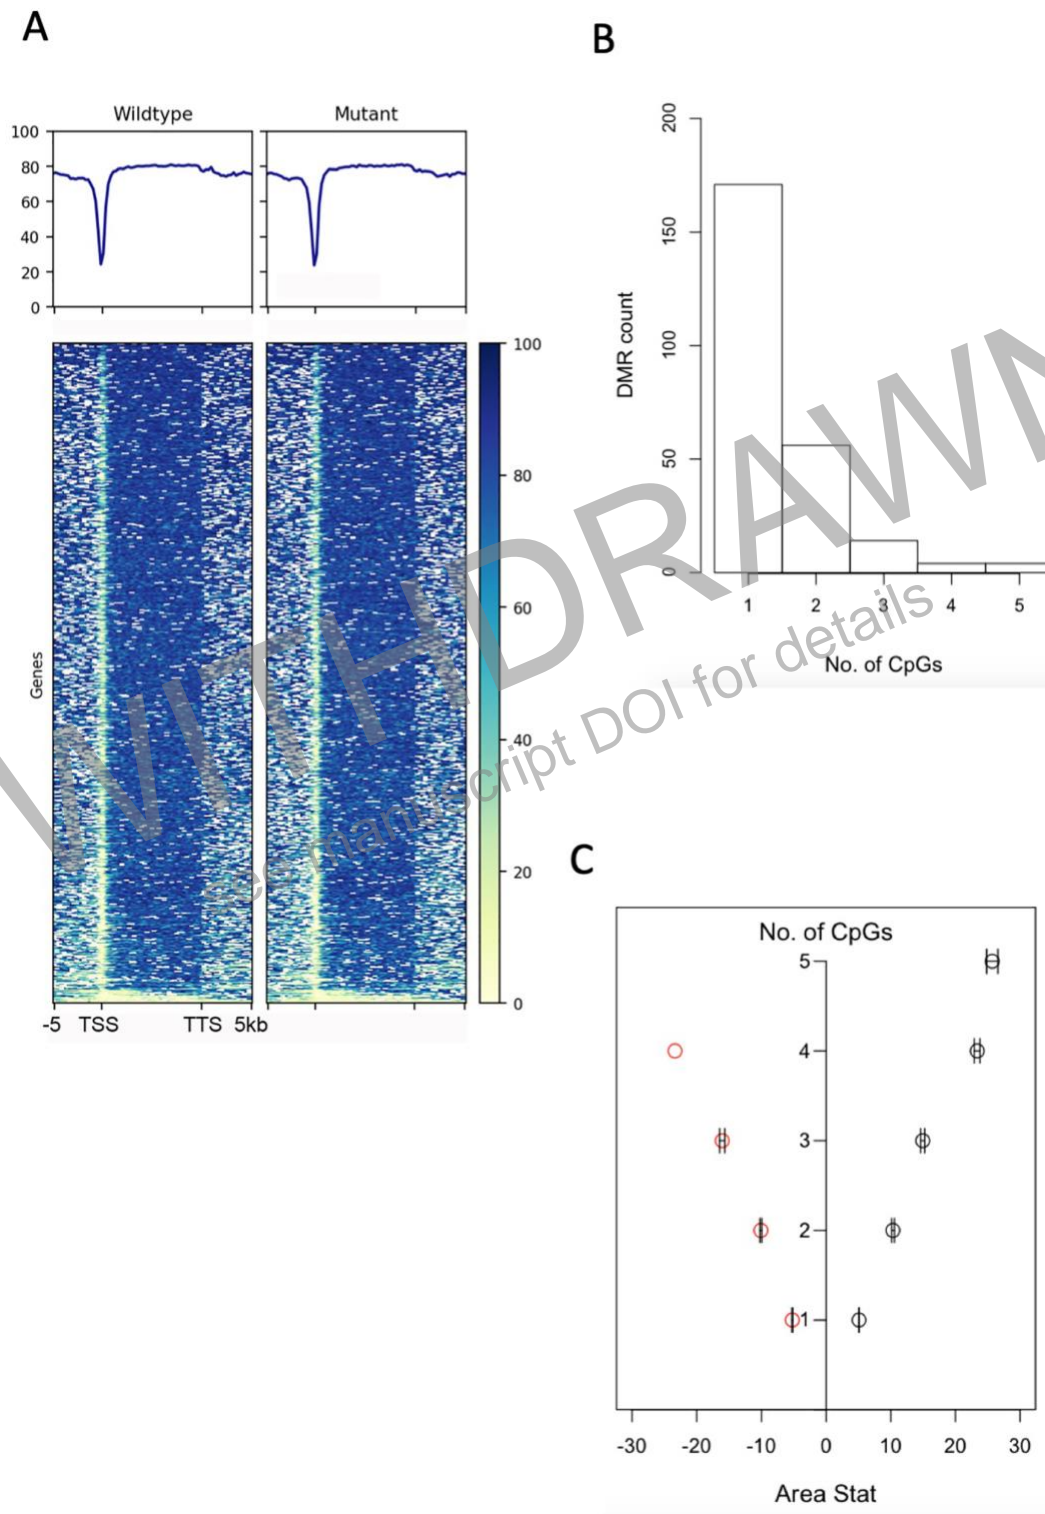

1474

1475

1476

1477

Figure 2

1478

| Panther GO Biological Process Term        | Number of <i>Danio rerio</i> genes | Number of DMR-associated genes | Expected number of genes | Fold-enrichment | +/- | Raw P-value | FDR      |
|-------------------------------------------|------------------------------------|--------------------------------|--------------------------|-----------------|-----|-------------|----------|
| mesoderm development                      | 363                                | 10                             | 3.15                     | 3.18            | +   | 1.52E-03    | 3.28E-02 |
| ↳ developmental process                   | 1880                               | 37                             | 16.29                    | 2.27            | +   | 3.46E-06    | 2.74E-04 |
| regulation of catalytic activity          | 487                                | 13                             | 4.22                     | 3.08            | +   | 4.16E-04    | 1.23E-02 |
| ↳ regulation of molecular function        | 579                                | 13                             | 5.02                     | 2.59            | +   | 1.93E-03    | 3.51E-02 |
| ↳ biological regulation                   | 3893                               | 51                             | 33.73                    | 1.51            | +   | 2.48E-03    | 3.93E-02 |
| cellular protein modification process     | 928                                | 20                             | 8.04                     | 2.49            | +   | 2.11E-04    | 7.15E-03 |
| regulation of phosphate metabolic process | 656                                | 14                             | 5.68                     | 2.46            | +   | 2.06E-03    | 3.50E-02 |
| intracellular signal transduction         | 1498                               | 30                             | 12.98                    | 2.31            | +   | 2.14E-05    | 1.02E-03 |
| ↳ signal transduction                     | 2870                               | 51                             | 24.87                    | 2.05            | +   | 6.03E-07    | 7.14E-05 |
| ↳ cell communication                      | 3347                               | 58                             | 29.00                    | 2.00            | +   | 2.03E-07    | 4.82E-05 |
| ↳ cellular process                        | 9777                               | 116                            | 84.72                    | 1.37            | +   | 2.46E-05    | 9.71E-04 |
| single-multicellular organism process     | 1836                               | 30                             | 15.91                    | 1.89            | +   | 9.34E-04    | 2.46E-02 |
| ↳ multicellular organism process          | 1836                               | 30                             | 15.93                    | 1.89            | +   | 9.42E-04    | 2.23E-02 |
| response to stimulus                      | 3101                               | 43                             | 26.87                    | 1.60            | +   | 1.83E-03    | 3.61E-02 |
| unclassified                              | 11889                              | 69                             | 103.02                   | 0.67            | -   | 4.03E-06    | 2.39E-04 |

1479

1480

1481

1482

Figure 2 – Figure supplement 1

1483

| Gene annotation     | Location               | Wild Type | s357 Mutant |
|---------------------|------------------------|-----------|-------------|
| <i>fkbp5</i>        | 6: 41099291- 41099447  | 2813      | 3167        |
| <i>npepl1</i>       | 6: 49743986-49744068   | 3453      | 2443        |
| <i>stxbp5l</i>      | 9: 27628949-27629130   | 260       | 432         |
| <i>ptger1c</i>      | 3: 52284631- 52284792  | 4065      | 4908        |
| <i>npy2rl</i>       | 1: 9551262-9551392     | 2036      | 2126        |
| <i>ece2b/lpar6a</i> | 15: 4079241-4079376    | 6447      | 6498        |
| <i>chrm2a</i>       | 4: 1213629-1213828     | 4992      | 4208        |
| <i>dpp6a</i>        | 24: 6909239-6909310    | 3725      | 4529        |
| <i>gna14</i>        | 5: 54901068- 54901189  | 6495      | 3937        |
| <i>foxred2</i>      | 3: 25888004-25888127   | 4101      | 4397        |
| <i>aplp1</i>        | 15: 37250007- 37250123 | 7881      | 7125        |

1484

1485

1486

1487

Figure 2 – Figure supplement 2

WITHDRAWN  
see manuscript DOI for details

1488

| Location     | CpG | Gene annotation        | p-value |     |
|--------------|-----|------------------------|---------|-----|
| 6: 49743986  | 1   | <i>npepl1</i> intron 1 | 0.0125  | *   |
| 6: 49743996  | 2   |                        | 0.0506  | n.s |
| 6: 49744039  | 3   |                        | 0.1235  | n.s |
| 6: 49744053  | 4   |                        | 0.1235  | n.s |
| 6: 49744068  | 5   |                        | 0.0287  | *   |
| 6: 41099291  | 1   | <i>fkbp5</i> intron 1  | 0.0003  | *** |
| 6: 41099385  | 2   |                        | 0.1389  | n.s |
| 6: 41099420  | 3   |                        | 0.0003  | *** |
| 6: 41099447  | 4   |                        | 0.0017  | **  |
| 15: 37250007 | 1   | <i>aplp1</i> intron 1  | 0.8384  | n.s |
| 15: 37250053 | 2   |                        | <0.0001 | *** |
| 15: 37250055 | 3   |                        | 0.00373 | **  |
| 15: 37250075 | 4   |                        | 0.55468 | n.s |
| 15: 37250089 | 5   |                        | 0.55468 | n.s |
| 15: 37250123 | 6   |                        | 0.64    | n.s |

1489

1490

1491

1492

Figure 2 – Figure supplement 3

1493

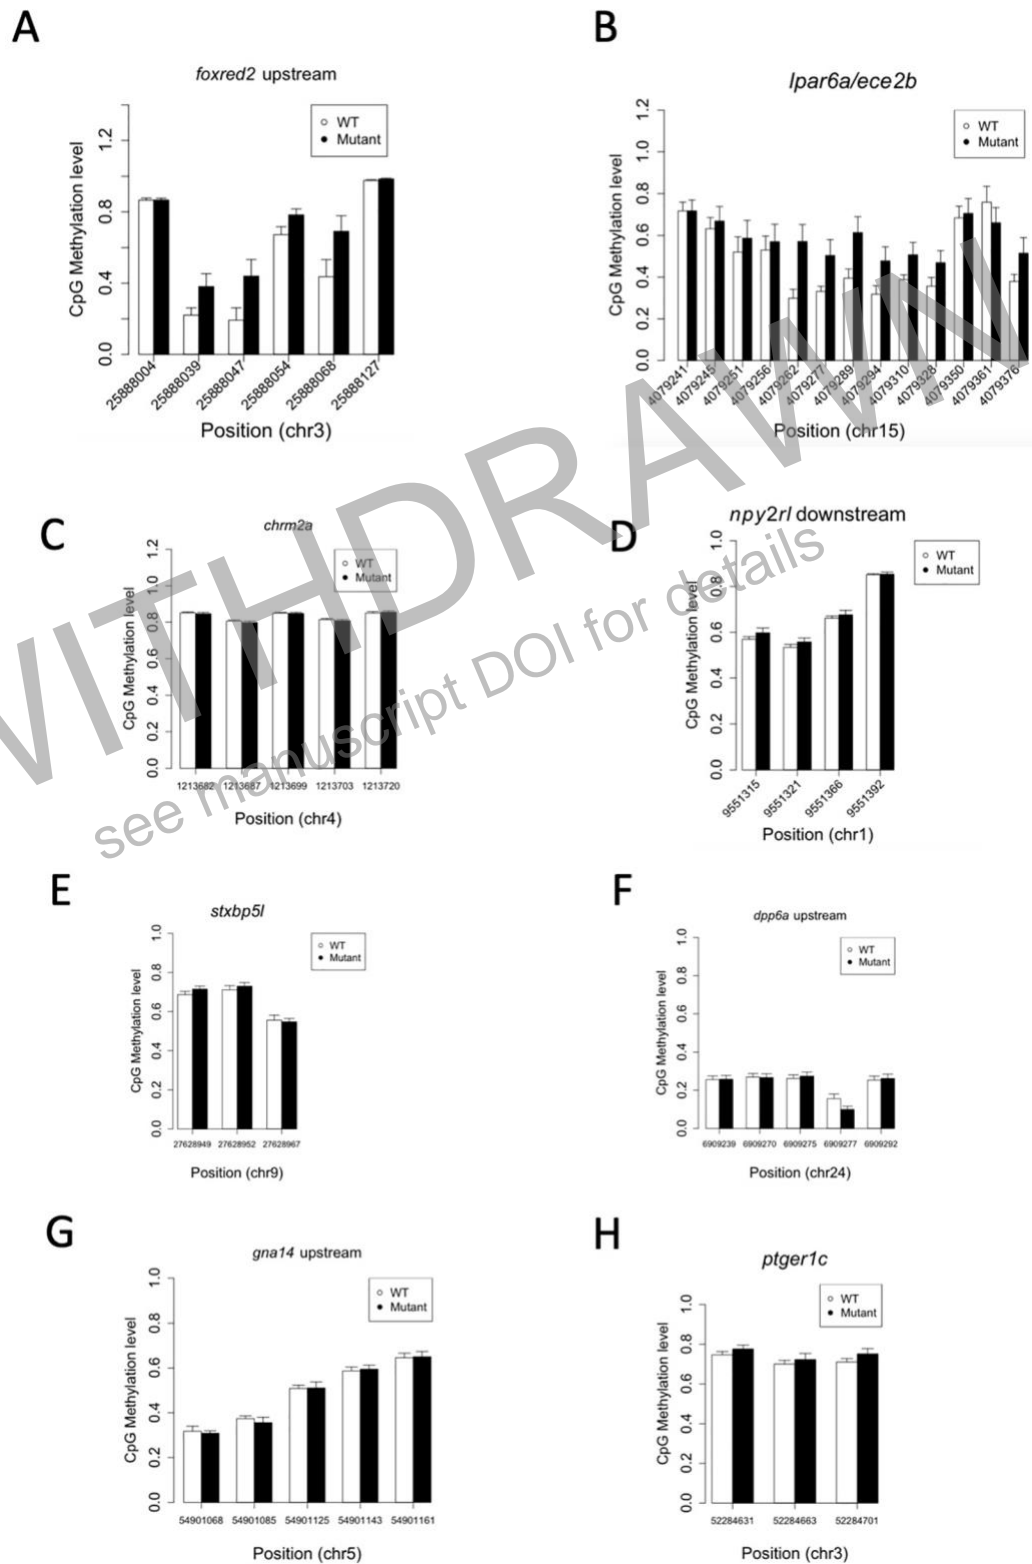

1494

1495

1496

Figure 2 – Figure supplement 4



1497

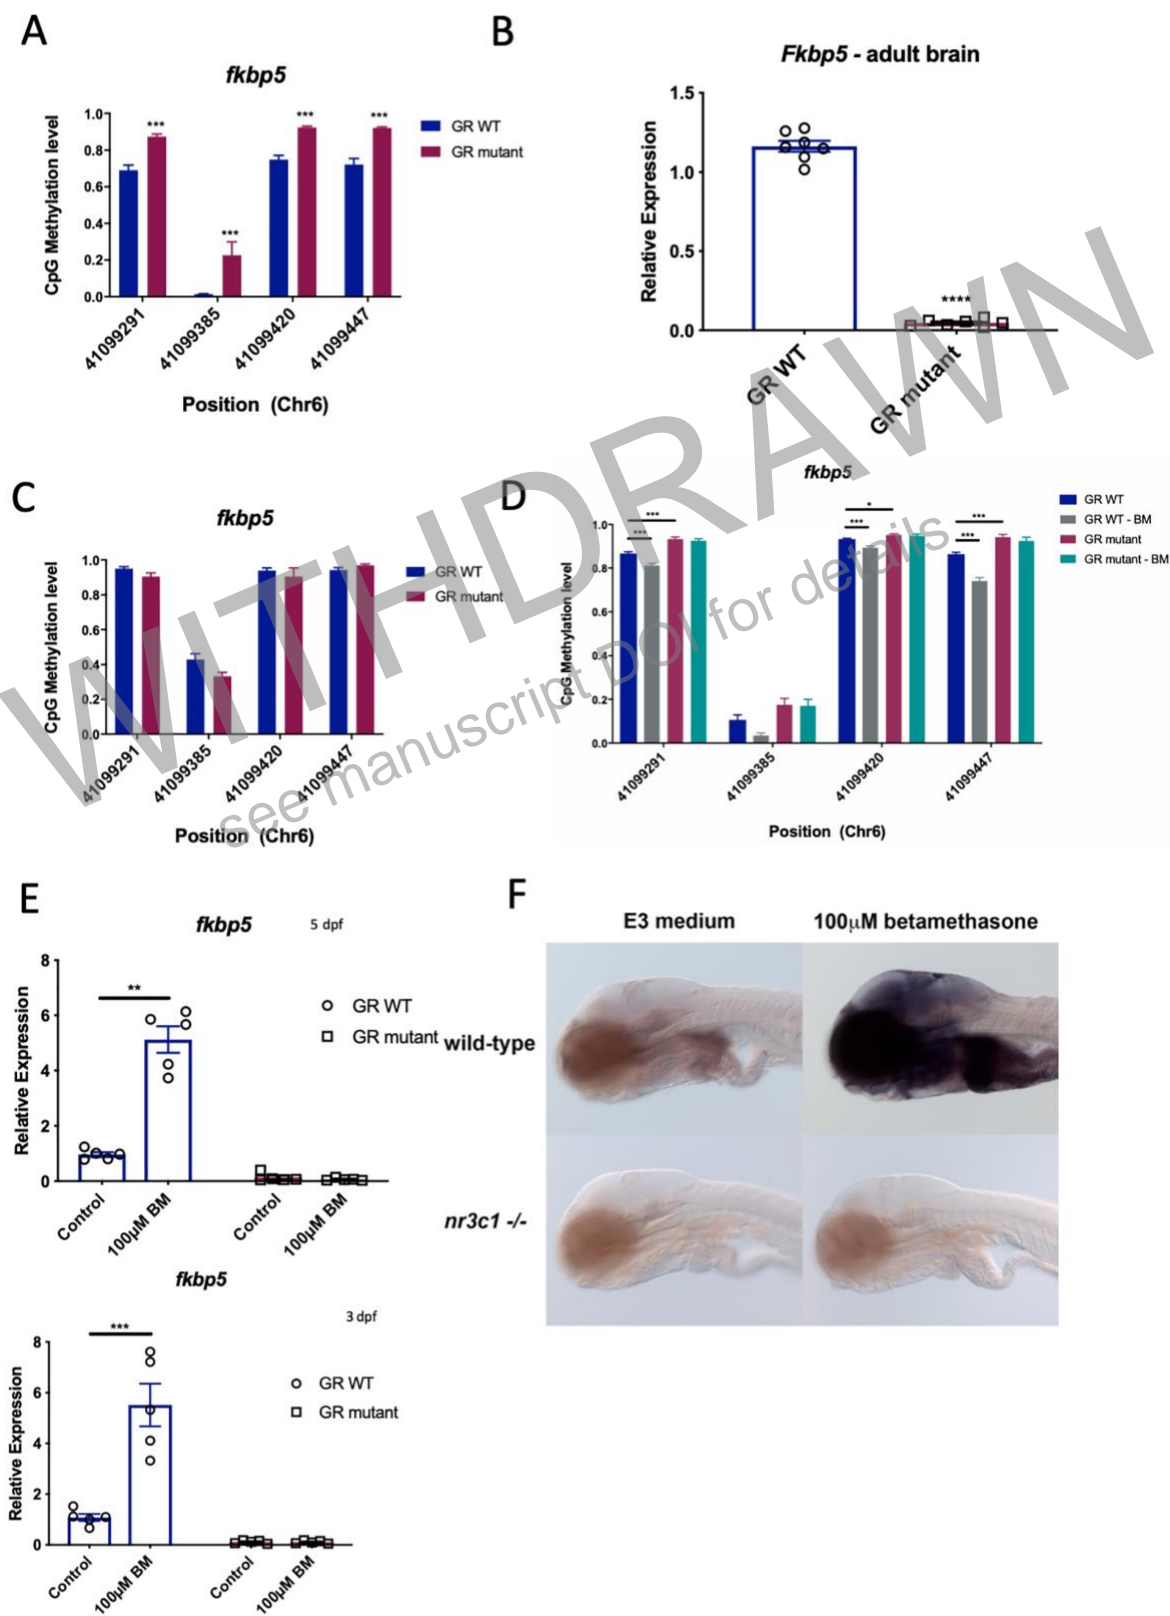

1498

1499

Figure 3

1500

1501

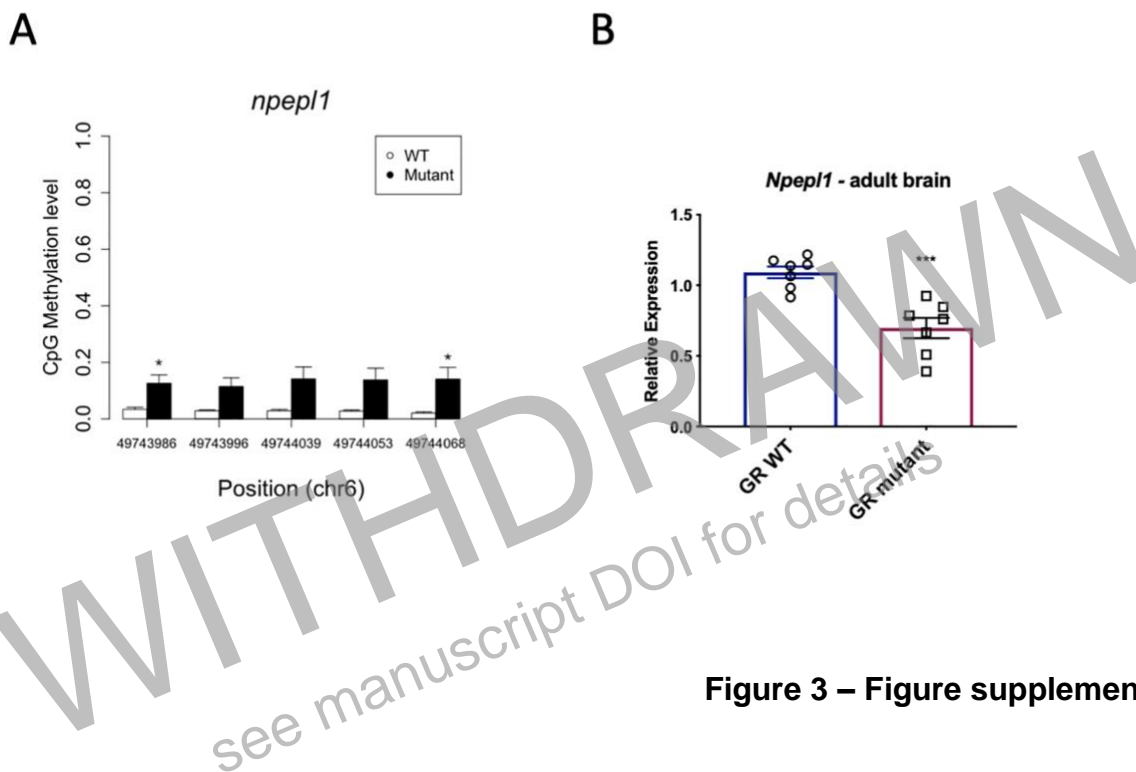

1502

1503

1504

1505

1506

1507

Figure 3 – Figure supplement 1

1508

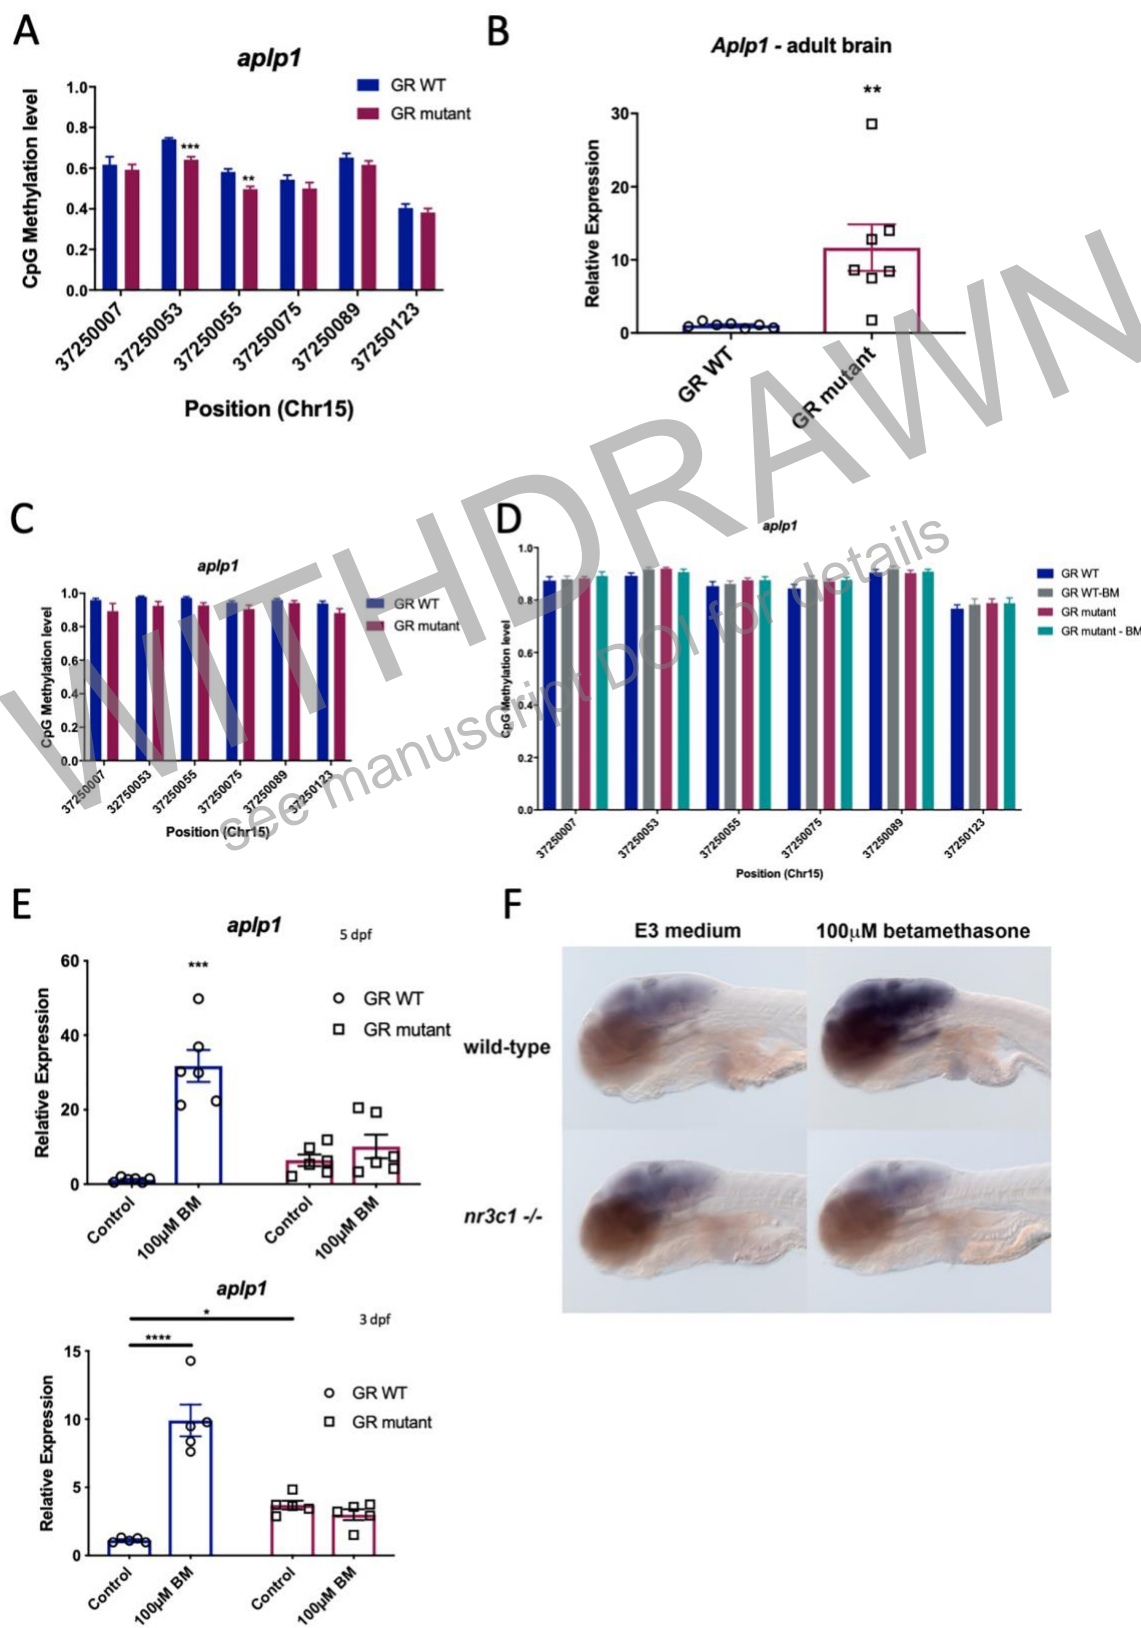

1509

1510

Figure 4

1511

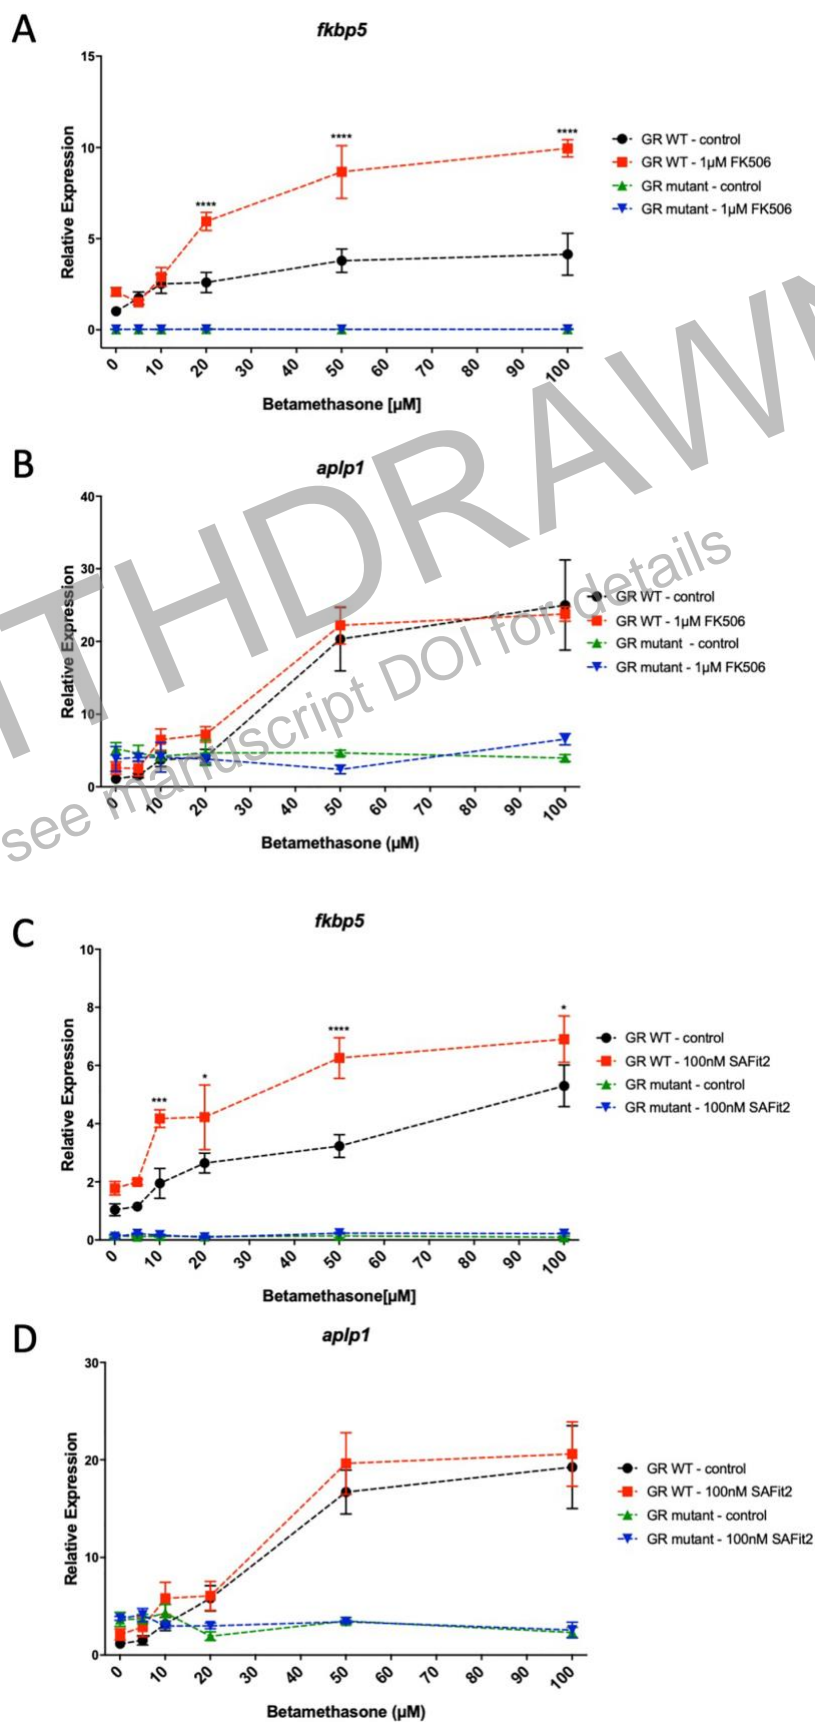

1512

Figure 5

1513

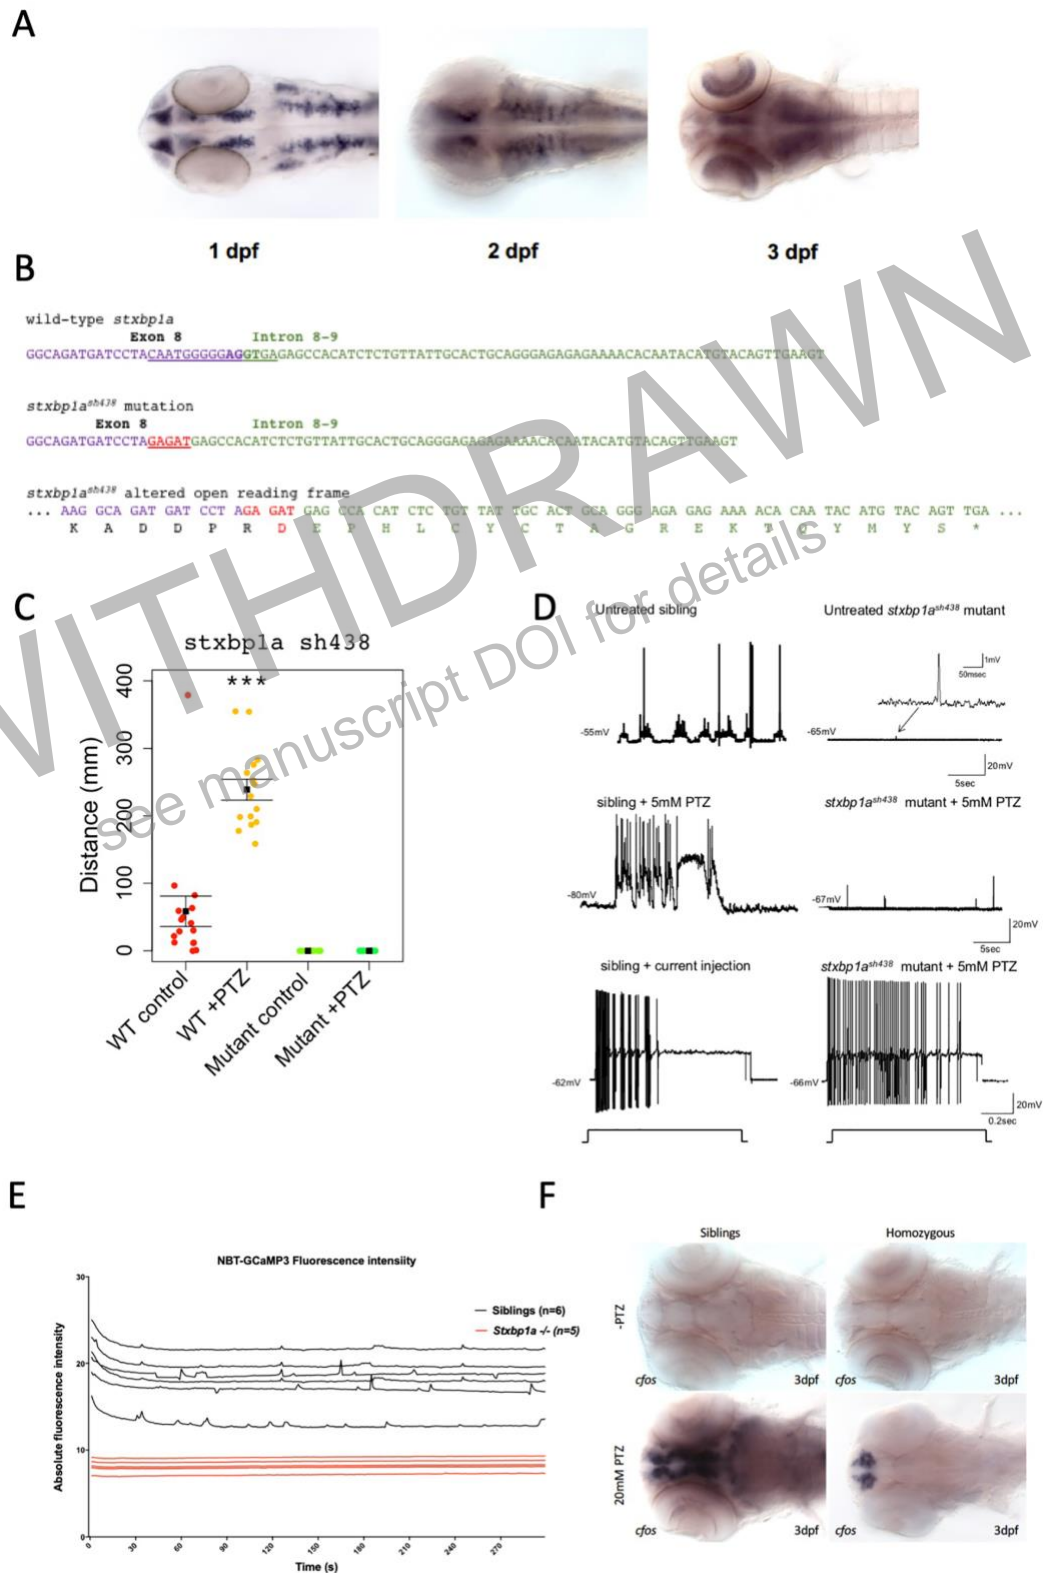

1514

1515

1516

Figure 6

1517

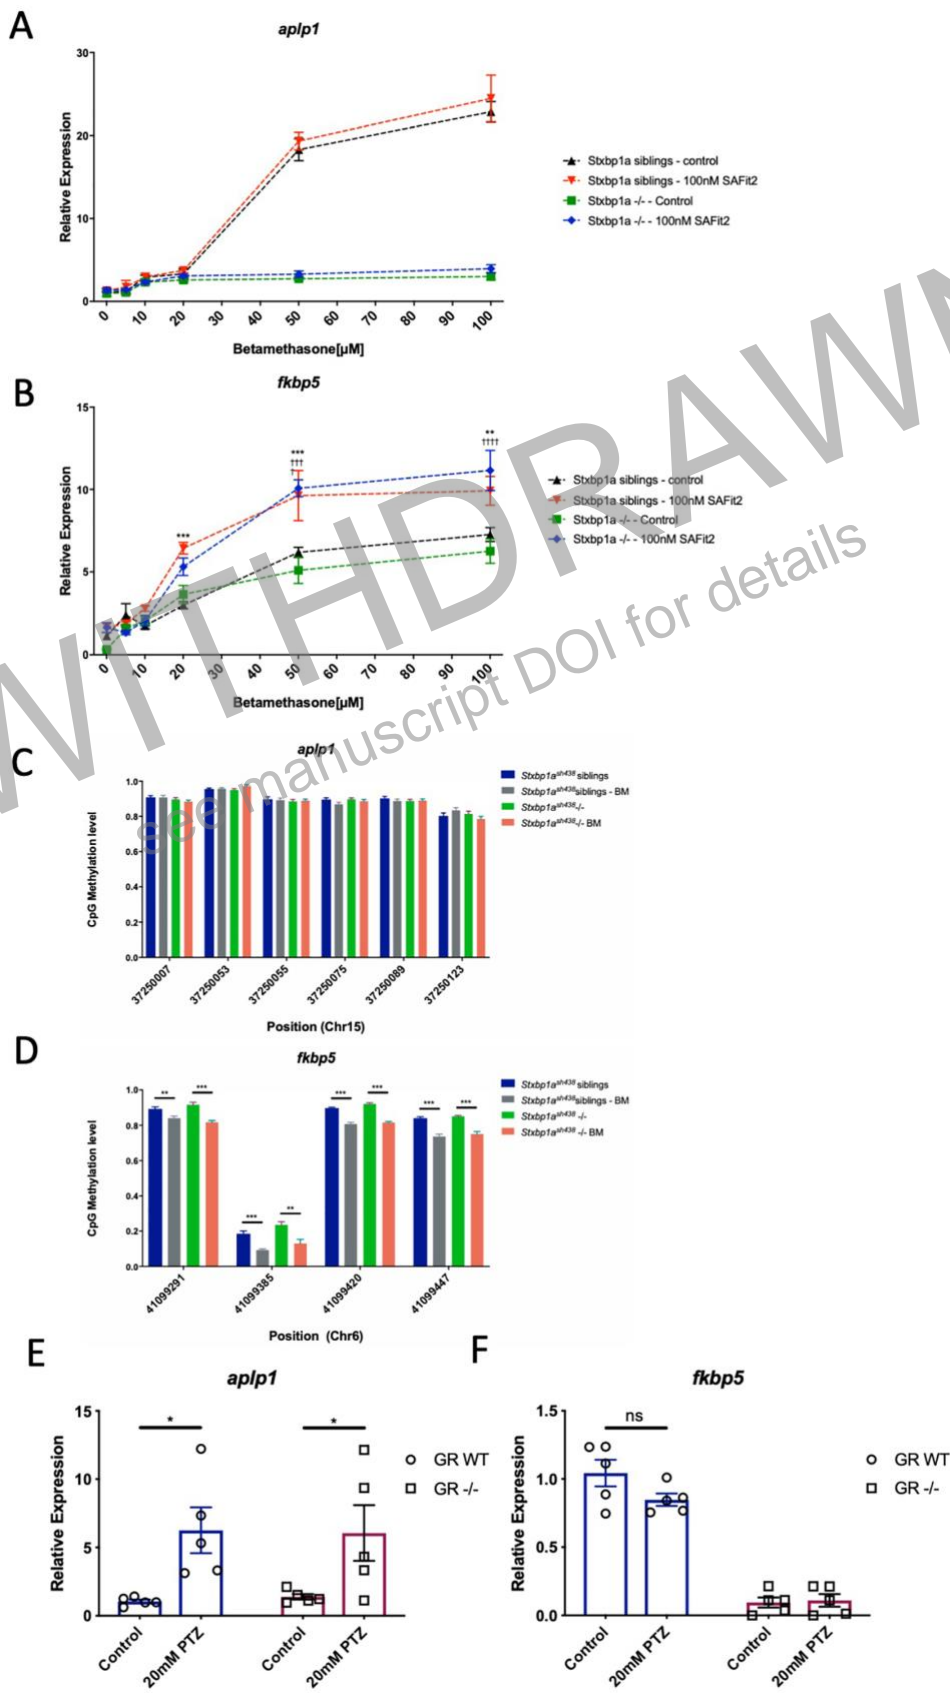

1518

Figure 7

1519

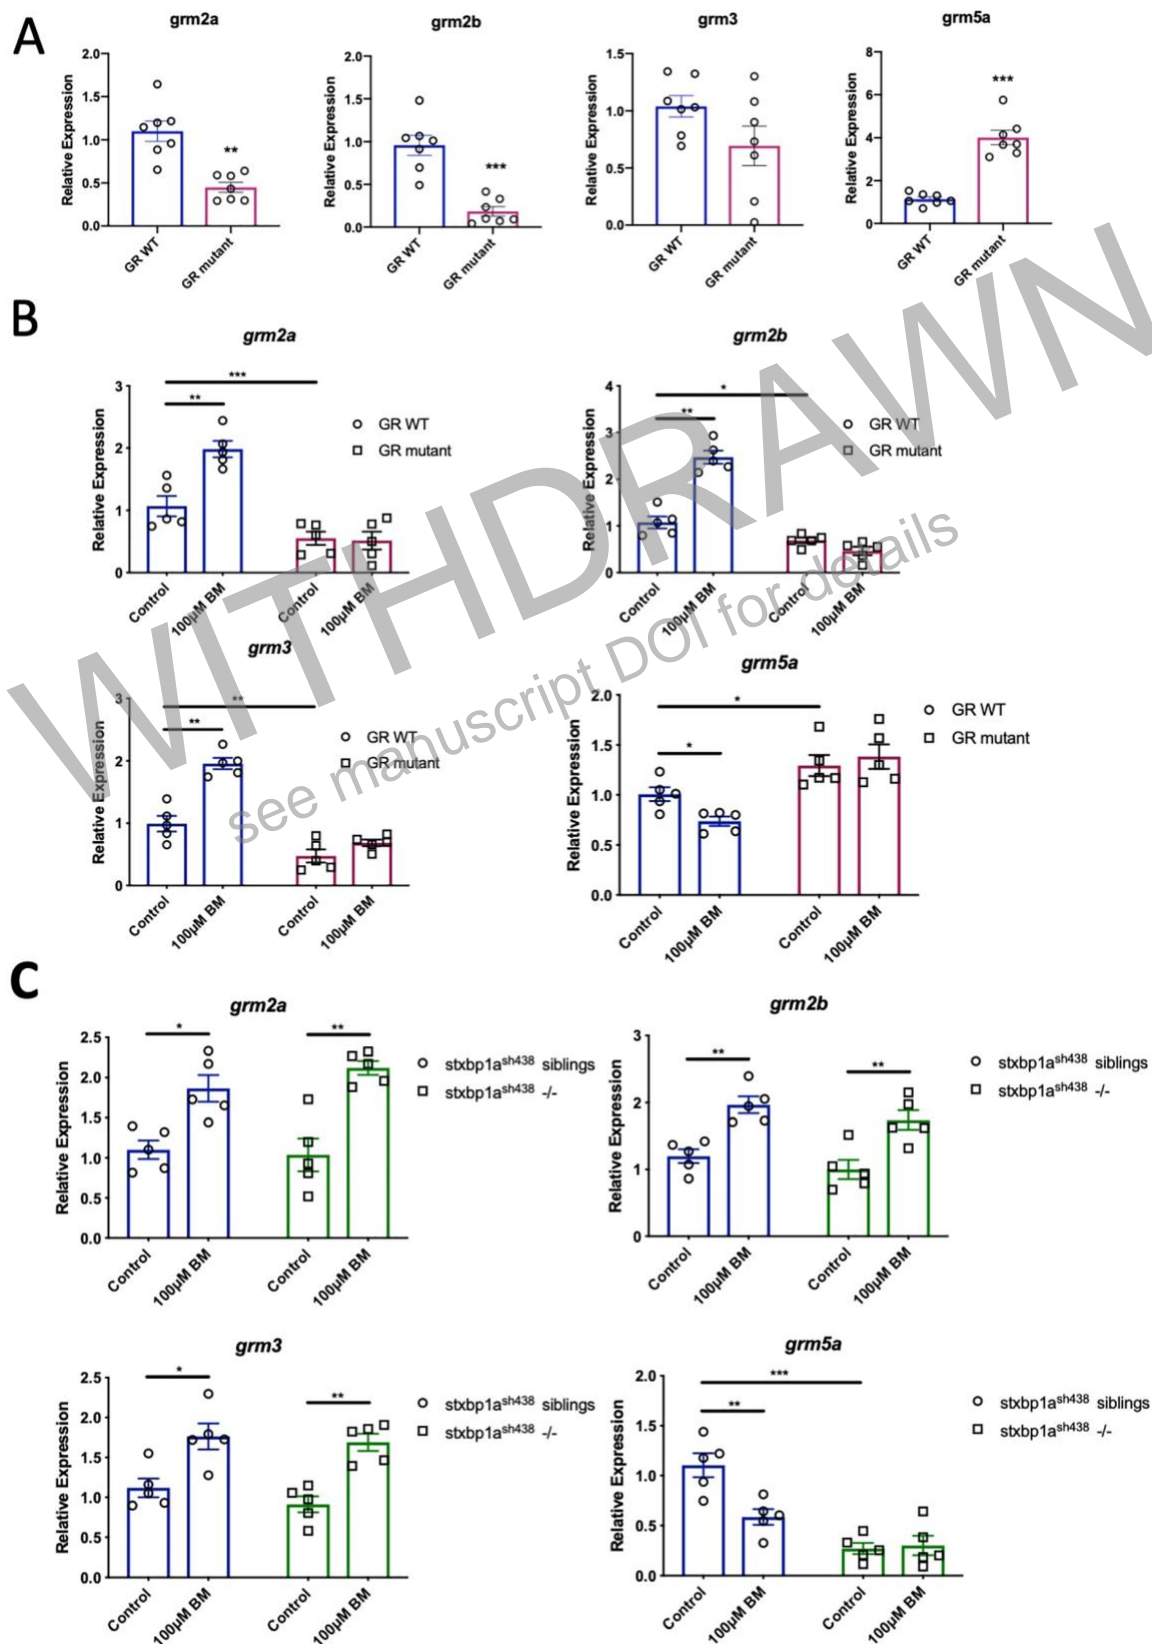

1520

1521

Figure 8

**A**

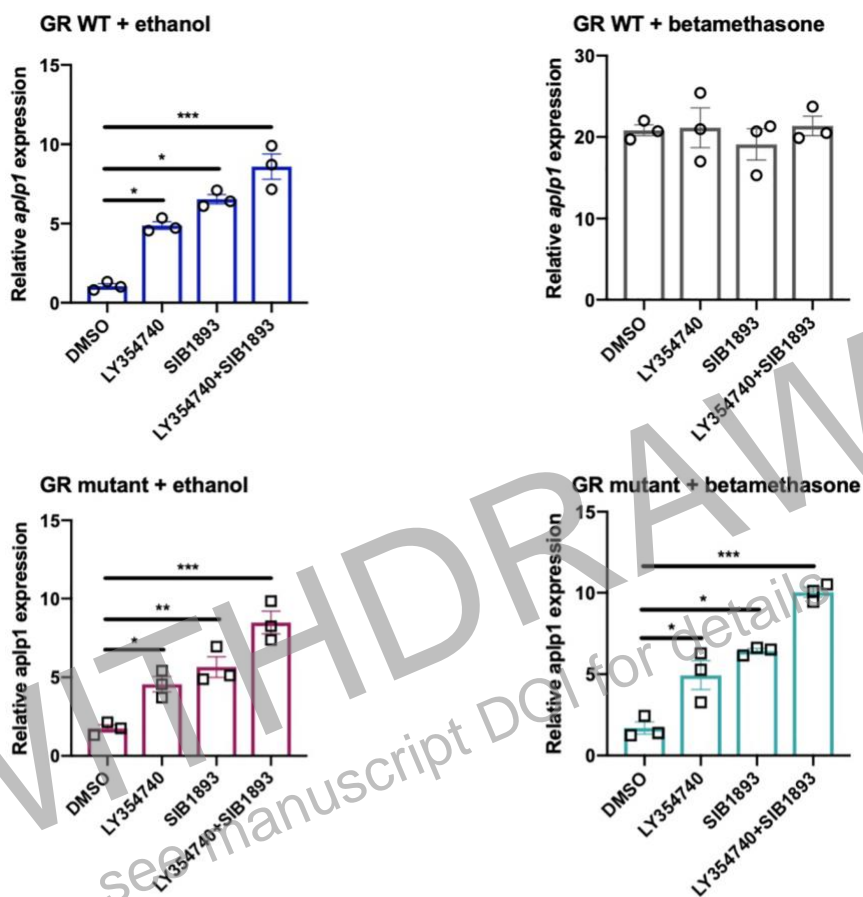

**B**

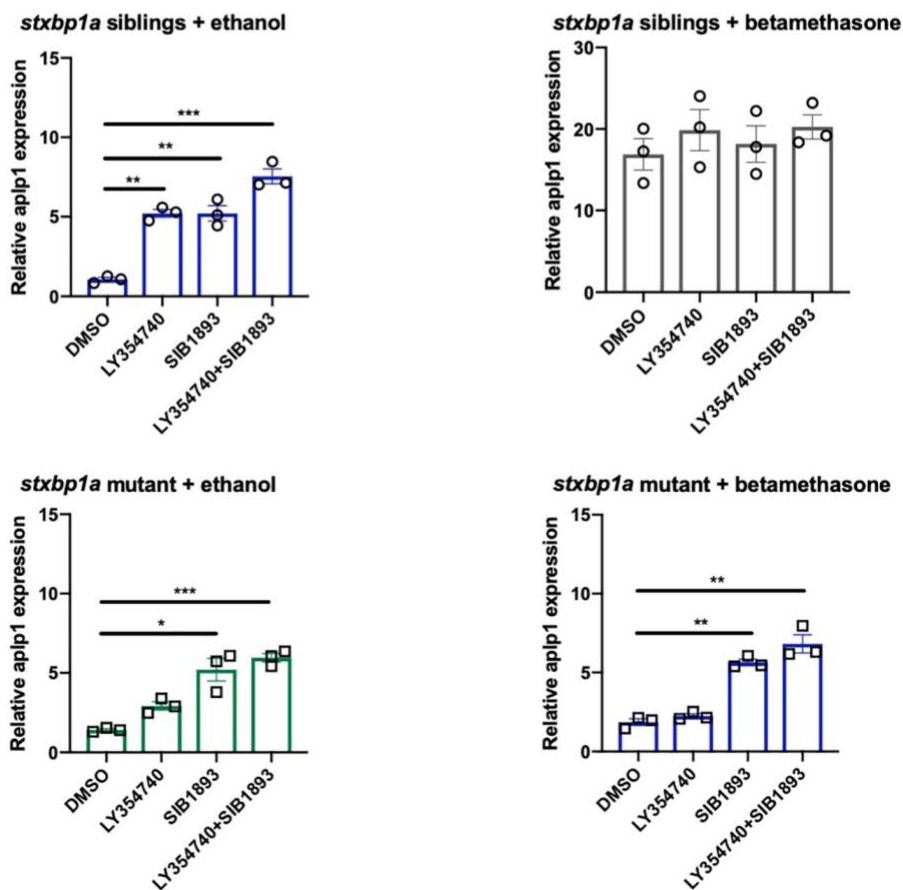



1523

The *fkbp5* promoter contains multiple GREs

AATCATGATGATGATGTTGAATTATATCGCTACACCGGCTCTATTTCGATTTTATGCTCAA  
TATGCTGCTTTAGTTCTAGGCTTGGTATAGTGCATCCCGATGGTGTGTGTCAGTCTG  
TTCTTGCTTTCTGTTTCATCACCTGCATCCTCATCAGAAGTGTAAAATATAAACAGCCTA  
CCATCCAACACCCACAATCGTCTTCGTAGTATGTTTTTCTCTACTTATTTTTTACTTC  
CACATTTTTTCTCGACGCAATCTAGTCGTGTTGTTCTTTCCGCGTATCGCTGTGCTCTGT  
GTGGTTGTACACGCTGTTCCCTAACTGAGCTGTTCACTCAGCACACAACGGGTTACGGGT  
CAGGGTGTCTAC**TAGGACACTGTGTTCTC**ATCAGCGGAGCTACAGTACAGCC**GGAAACAT**  
**TGTGTTACT**TTGTGGACAGTTTCCAAGGCCTGCCCTTAATTTTACTCCACACCGCCCTCC  
CCCAGCGTTTACTCCTCCTCCTTTAGTCTCATTTCATTCCCCCGTCCAATGTCTCGCA  
GAGGCGTATCGTGTGATGAT

+1

Fkbp5 intron 1

**Bold = DMR identified by initial WGBS**

**Red = CpG**

AAAGAGACTGATGTTGACTGATGGTAAAGCCGAGATGGTTAAGTTCCTGCCCTTACTCTTTATTTTGGATG  
TGCTGAGGAGTCAGATGTTTTATATTTTATAAATGGTGCATTT**CGTGACCTCAACTA**CTGATATCACTGACCAAAATTC  
**GTTTGAACCTGGTGCACGACCTGCGTCTTCAAGCATATTTTCAACTATTTGTTTATA**

TF binding sites specific to CpG 1:

| Matrix ID | Name   | Score  | Relative score | Start | End | Strand | Predicted sequence |
|-----------|--------|--------|----------------|-------|-----|--------|--------------------|
| MA0719.1  | RHOXF1 | 6.4542 | 0.928687632492 | 18    | 25  | +      | TAAAGCCG           |

TF binding sites specific to CpG 2:

| Matrix ID | Name        | Score   | Relative score | Start | End | Strand | Predicted sequence |
|-----------|-------------|---------|----------------|-------|-----|--------|--------------------|
| MA0018.3  | CREB1       | 10.2458 | 0.873101660438 | 94    | 105 | +      | CGTGACTCAA         |
| MA0018.3  | CREB1       | 10.2458 | 0.873101660438 | 94    | 105 | +      | GTTGAGGTCACG       |
| MA0492.1  | JUND(var.2) | 10.9853 | 0.910021151889 | 81    | 95  | -      | CGAATGACACCATT     |
| MA0017.2  | NR2F1       | 10.4685 | 0.888630827655 | 92    | 104 | -      | TTGAGGTCACGAA      |
| MA0512.1  | Rxra        | 8.57792 | 0.887886152628 | 94    | 104 | -      | TTGAGGTCACG        |

TF binding sites specific to CpG 3:

| Matrix ID | Name | Score   | Relative score | Start | End | Strand | Predicted sequence |
|-----------|------|---------|----------------|-------|-----|--------|--------------------|
| MA0068.2  | PAX4 | 8.49127 | 0.881687643938 | 123   | 130 | +      | CAAATTCG           |

No strong TF binding sites specific to CpG 4.

Aplp1 intron 1

**Bold = DMR identified by initial WGBS**

**Red = CpGs 2 and 3 found to be hypomethylated in adult GR mutant brains**

ATTCATATGTACTAGAATTTAGTTTTATTATGGGCATTTAACACTTGTGTTGAAAGCAGAAGAGAGCAAAAAGTATG  
AACGTAAGTGGAAAATGAAAAAGCACAAATATTGAAATGAAAAGCAC**CGCGT**CAGCTTGTCTCATCAGCCGAAATGG  
ATAAATCGCTCTTAAACATGCACATTAGCCTTCAATGCACGCACCTGCCTGAAAGAAATGGCAAAATATCATCTTTATCC

TF binding sites specific to CpGs 2 and 3:

| Matrix ID | Name        | Score   | Relative score | Sequence ID | Start | End | Strand | Predicted sequence |
|-----------|-------------|---------|----------------|-------------|-------|-----|--------|--------------------|
| MA0006.1  | Ahr::Arnt   | 9.19659 | 0.982764428382 |             | 128   | 133 | -      | CGCGTG             |
| MA1099.1  | Hes1        | 10.0756 | 0.966791899001 |             | 126   | 135 | +      | AGCACGCGTC         |
| MA0259.1  | ARNT::HIF1A | 8.5274  | 0.920298474157 |             | 127   | 134 | -      | ACGCGTGC           |
| MA0649.1  | HEY2        | 10.2242 | 0.898251694306 |             | 126   | 135 | -      | GACGCGTCT          |
| MA0823.1  | HEY1        | 9.81512 | 0.891781028421 |             | 126   | 135 | +      | AGCACGCGTC         |
| MA0104.2  | Mycn        | 10.3227 | 0.900371094766 |             | 126   | 135 | +      | AGCACGCGTC         |
| MA0104.1  | Mycn        | 7.79027 | 0.897764306533 |             | 128   | 133 | +      | CACGCG             |
| MA0147.1  | Myc         | 10.1463 | 0.892427955913 |             | 126   | 135 | +      | AGCACGCGTC         |
| MA0632.1  | Tcf15       | 7.96715 | 0.937086785253 |             | 126   | 135 | +      | AGCACGCGTC         |
| MA0632.1  | Tcf15       | 7.96715 | 0.937086785253 |             | 126   | 135 | -      | GACGCGTCT          |

1524

1525

Figure 10

1526

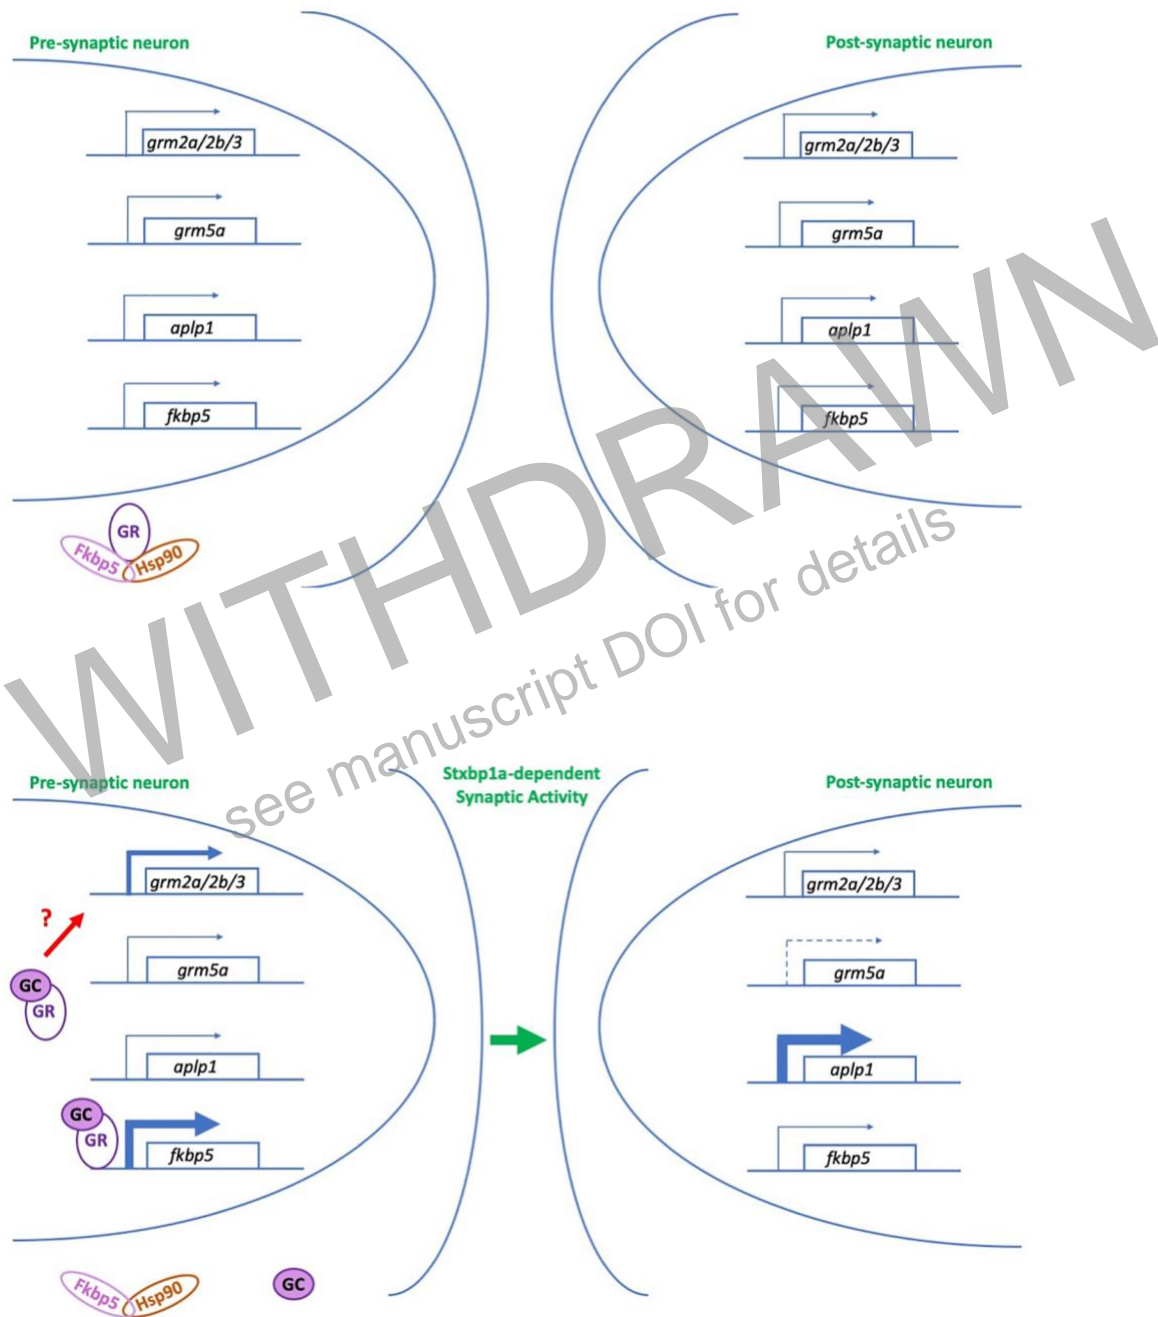

1527

1528

1529

Figure 11
